# Supplementary material for: Myofibril diameter is set by a finely tuned mechanism of protein oligomerization in Drosophila
Source: eLife. 2019 Nov 20;8:e50496. doi: 10.7554/eLife.50496 (PMC6910826; doi:10.7554/eLife.50496)
Supplement: Figure 1—source data 1. [file elife-50496-fig1-data1.xlsx]

## Sheet: Sheet1
Figure 1 Aggregate frequency estimates in Zasp overexpressions									Figure 1 Aggregate frequency estimates in weak Zasp52 overexpression
Control (Act88-Gal4)	Zasp52-PR	Zasp52-PK	Zasp52-PP	Zasp52-PR-ΔZM	Zasp52-PR-ΔPDZ	Zasp66	Zasp67		Control (UH3-Gal4)	Act88F>Zasp52-PR	UH3>Zasp52-PR
0	0.0206767	0	0	0.0018797	0.0131579	0	0		0	0.0206767	0
0	0.018797	0	0	0	0.0018797	0	0		0	0.0300752	0
0	0.0225564	0	0	0	0.0150376	0	0		0	0.0131579	0
0	0.0244361	0	0	0	0.0112782	0	0		0	0.0169173	0
0	0.0225564	0	0	0.0018797	0.0093985	0	0		0	0.0206767	0
0	0.0150376	0	0	0	0.018797	0	0		0	0.0244361	0
0	0.0244361	0	0	0	0.0075188	0	0		0	0.0131579	0
0	0.0225564	0	0	0.0018797	0.0056391	0	0		0	0.0169173	0
0	0.0281955	0	0	0	0.0037594	0	0		0	0.0150376	0
0	0.0169173	0	0	0	0.0093985	0.0018797	0		0	0.0169173	0
0	0.018797	0	0	0.0018797	0.0075188	0	0		0	0.0281955	0
0	0.0150376	0	0	0	0.0075188	0	0		0	0.0225564	0
0	0.0338346	0	0	0	0.0112782	0	0		0	0.0281955	0
0	0.0244361	0	0	0	0.0169173	0	0		0	0.0150376	0
0	0.0263158	0	0	0	0.0075188	0	0		0	0.018797	0
0	0.0206767	0	0	0	0.0131579	0	0		0	0.0225564	0
0	0.0319549	0	0	0	0.0112782	0	0		0	0.018797	0
0	0.018797	0	0	0.0018797	0.0075188	0.0018797	0		0	0.0225564	0
0	0.0357143	0	0	0	0.0018797	0	0		0	0.0319549	0
0	0.0206767	0	0	0	0.018797	0	0		0	0.0206767	0
0	0.0150376	0	0	0	0.0131579	0	0		0	0.0150376	0
0	0.0169173	0	0	0.0018797	0.0131579	0	0		0	0.018797	0
0	0.0300752	0	0	0	0.0169173	0	0		0	0.0244361	0
0	0.0150376	0	0	0	0.0112782	0.0018797	0		0	0.0244361	0
0	0.0263158	0	0	0	0.018797	0	0		0	0.0169173	0
0	0.0131579	0	0	0	0.0112782	0	0		0	0.0281955	0
0	0.0263158	0	0	0.0018797	0.0131579	0	0		0	0.0206767	0
0	0.0281955	0	0	0	0.0131579	0	0		0	0.0131579	0
0	0.0169173	0	0	0	0.0169173	0	0		0	0.0394737	0
0	0.0225564	0	0	0	0.0093985	0	0		0	0.0206767	0
0	0.0225564	0	0	0	0.0112782	0	0		0	0.0112782	0
0	0.0281955	0	0	0	0.0037594	0	0		0	0.0169173	0
0	0.018797	0	0	0	0.0093985	0.0018797	0		0	0.0244361	0
0	0.0206767	0	0	0	0.0131579	0	0		0	0.0150376	0
0	0.0244361	0	0	0	0.0037594	0	0		0	0.018797	0
0	0.0281955	0	0	0	0.0056391	0	0		0	0.0319549	0
0	0.037594	0	0	0	0.0150376	0	0		0	0.0244361	0
0	0.0112782	0	0	0	0.0112782	0	0		0	0.0169173	0
0	0.0206767	0	0	0	0.0112782	0	0		0	0.0225564	0
0	0.0169173	0	0	0	0.0075188	0	0		0	0.0225564	0
0	0.018797	0	0	0	0.0169173	0	0		0	0.0150376	0
0	0.0319549	0	0	0	0.0093985	0.0018797	0		0	0.018797	0
0	0.0225564	0	0	0	0.0075188	0	0		0	0.0169173	0
0	0.0244361	0	0	0	0.0150376	0	0		0	0.0112782	0
0	0.0206767	0	0	0.0018797	0.0075188	0	0		0	0.0169173	0
0	0.0206767	0	0	0	0.0131579	0	0		0	0.018797	0
0	0.0131579	0	0	0	0.0056391	0	0		0	0.018797	0
0	0.0263158	0	0	0	0.0056391	0	0		0	0.0093985	0
0	0.0225564	0	0	0	0.0075188	0	0		0	0.0206767	0
0	0.018797	0	0	0	0.0093985	0	0		0	0.0281955	0
0	0.0206767	0	0	0.0018797	0.0169173	0.0018797	0		0	0.0225564	0
0	0.0281955	0	0	0	0.0131579	0	0		0	0.0169173	0
0	0.0131579	0	0	0.0018797	0.0112782	0	0		0	0.018797	0
0	0.018797	0	0	0.0018797	0.0150376	0	0		0	0.0263158	0
0	0.0037594	0	0	0	0.0075188	0	0		0	0.0206767	0
0	0.0244361	0	0	0	0.0112782	0	0		0	0.0150376	0
0	0.0263158	0	0	0	0.0112782	0	0		0	0.0169173	0
0	0.0206767	0	0	0	0.0075188	0	0		0	0.0206767	0
0	0.0244361	0	0	0	0.0093985	0.0018797	0		0	0.0281955	0
0	0.0281955	0	0	0	0.0018797	0	0		0	0.018797	0
0	0.0300752	0	0	0	0.0056391	0	0		0	0.0244361	0
0	0.0225564	0	0	0	0.0093985	0	0		0	0.0075188	0
0	0.0263158	0	0	0	0.0150376	0.0018797	0		0	0.018797	0
0	0.0244361	0	0	0	0.0131579	0.0018797	0		0	0.0206767	0
0	0.018797	0	0	0.0018797	0.0131579	0	0		0	0.018797	0
0	0.0206767	0	0	0	0.0093985	0	0		0	0.0075188	0
0	0.0206767	0	0	0	0.0131579	0	0		0	0.0263158	0
0	0.0150376	0	0	0	0.0075188	0	0		0	0.0244361	0
0	0.0225564	0	0	0	0.0075188	0	0		0	0.0206767	0
0	0.0338346	0	0	0.0018797	0.0112782	0	0		0	0.0131579	0
0	0.018797	0	0	0	0.0037594	0	0		0	0.0206767	0
0	0.0225564	0	0	0	0.0075188	0	0		0	0.0244361	0
0	0.0244361	0	0	0	0.0037594	0	0		0	0.018797	0
0	0.018797	0	0	0	0.0206767	0	0		0	0.0281955	0
0	0.018797	0	0	0	0.0056391	0	0		0	0.0169173	0
0	0.0225564	0	0	0	0.0056391	0	0		0	0.0244361	0
0	0.0112782	0	0	0	0.0093985	0	0		0	0.0131579	0
0	0.0206767	0	0	0	0.0093985	0	0		0	0.0300752	0
0	0.0225564	0	0	0	0.0093985	0	0		0	0.0169173	0
0	0.0281955	0	0	0	0.0150376	0	0		0	0.037594	0
0	0.0206767	0	0	0	0.0112782	0	0		0	0.0319549	0
0	0.0225564	0	0	0	0.0131579	0.0018797	0		0	0.018797	0
0	0.0206767	0	0	0	0.0056391	0	0		0	0.0300752	0
0	0.0263158	0	0	0	0.0037594	0	0		0	0.0244361	0
0	0.0281955	0	0	0	0.0075188	0	0		0	0.0244361	0
0	0.0244361	0	0	0	0.0112782	0	0		0	0.0056391	0
0	0.0338346	0	0	0	0.0150376	0	0		0	0.018797	0
0	0.0150376	0	0	0	0.0169173	0	0		0	0.0206767	0
0	0.0206767	0	0	0	0.0169173	0	0		0	0.0225564	0
0	0.0206767	0	0	0	0.0093985	0	0		0	0.0206767	0
0	0.0150376	0	0	0	0.0112782	0	0		0	0.0131579	0
0	0.0206767	0	0	0	0.0150376	0	0		0	0.0225564	0
0	0.0206767	0	0	0	0.0150376	0	0		0	0.0263158	0
0	0.0093985	0	0	0	0.0150376	0	0		0	0.0225564	0
0	0.0263158	0	0	0	0.0169173	0	0		0	0.0056391	0
0	0.0225564	0	0	0	0.0169173	0	0		0	0.0150376	0
0	0.0150376	0	0	0	0.0093985	0	0		0	0.0112782	0
0	0.018797	0	0	0.0018797	0.0056391	0	0		0	0.0225564	0
0	0.0093985	0	0	0	0.0169173	0	0		0	0.0056391	0
0	0.0169173	0	0	0.0018797	0.0075188	0	0		0	0.0150376	0
