# Supplementary material for: Myofibril diameter is set by a finely tuned mechanism of protein oligomerization in Drosophila
Source: eLife. 2019 Nov 20;8:e50496. doi: 10.7554/eLife.50496 (PMC6910826; doi:10.7554/eLife.50496)
Supplement: Figure 3—source data 1. [file elife-50496-fig3-data1.xlsx]

## Sheet: Sheet1
Figure 3G and H BIFC values; n=140; Expressed under Act88F-Gal4								Figure 3D Zasp66 relative fluorescence in control and different Zasp52 mutants						Figure 3 -Figure supplement 1C. Actinin relative fluorescence in control and different Zasp52 mutants
Zasp52-PK-NYFP + CYFP	NYFP + .Zasp52.PK	Zasp52-PK-NYFP + Zasp52-PK-CYFP	Zasp66-PH-NYFP + CYFP	Zasp66-PH--NYFP + Zasp52-PK-CYFP				Control	Zasp52 MIO2988	Zasp52 MIO0979				Control	Zasp52 MIO2988	Zasp52 MIO0979
1.13703	1.16056	1.27048	1.02766	1.24025				0.939464	0.91568	0.429022				1.00367	1.0769	1.09914
1.02753	1.00793	1.52041	0.947472	1.26792				1.00398	0.905434	0.444744				1.0173	0.995862	1.05709
0.982321	1.02878	1.70392	0.991455	1.13974				0.964536	0.909216	0.413377				1.0214	1.07841	1.0801
1.19247	1.27746	1.8193	0.8752	1.3511				1.04482	0.8903	0.448402				0.949697	0.980942	0.946835
1.03245	1.04152	1.44057	0.799758	1.13697				0.998298	0.723572	0.434243				1.05908	0.903777	0.801794
1.0265	1.10714	1.52899	0.900138	1.0334				0.979847	0.863709	0.432587				1.07038	1.05295	1.18884
1.08552	1.14671	1.62607	0.98958	1.00982				0.882651	0.792496	0.41377				1.05318	0.97325	1.08832
1.05958	0.942882	1.23833	1.03547	1.21485				0.98302	0.943632	0.40671				0.959383	1.07081	0.993689
1.08488	0.956907	1.23866	1.25631	1.01228				0.905669	0.952327	0.418494				1.02071	1.10848	1.02968
1.16432	1.14754	1.45948	1.21954	1.22422				0.98781	0.93364	0.407665				1.00801	0.837491	0.893038
1.31869	1.20037	1.63308	1.36129	1.36057				0.993515	0.882448	0.41481				1.05338	1.04086	1.00126
1.20475	1.1159	1.50777	1.19859	1.18694				0.915713	1.00128	0.411676				1.02263	1.11531	0.846024
1.09434	0.913374	1.47258	1.09473	1.06577				0.916472	0.969437	0.433818				1.05386	0.943039	1.07891
1.01681	0.98376	1.46601	1.15572	1.13618				0.943933	0.699462	0.392191				0.996816	1.08478	1.09253
1.07707	0.944195	1.31179	1.04326	1.00553				0.930729	0.69074	0.358678				0.973376	1.05735	1.00925
1.16923	1.0686	1.31937	0.992183	1.07475				0.941021	1.00161	0.379936				1.02382	1.01053	0.847787
1.21771	1.22893	1.16364	1.00221	1.19443				0.963555	0.91939	0.393238				0.850887	1.03822	1.04034
1.26646	1.24036	1.48797	1.37187	1.39055				0.821893	0.932652	0.409681				0.959781	0.937129	1.21592
1.17391	1.01005	1.22966	1.08927	1.17453				0.855851	1.00139	0.400697				0.977364	0.999354	1.17806
1.16501	1.06076	1.21312	0.948029	0.971065				0.91778	0.906212	0.408549				0.96626	0.958019	1.10671
0.918424	0.878924	0.975207	1.14341	1.31248				0.877463	0.929021	0.399428				1.09022	1.05047	1.23641
1.10707	1.0383	1.44239	0.994288	1.28058				0.988614	0.985984	0.395653				0.796931	1.12934	1.0939
1.22015	0.962106	1.42926	1.04331	1.29319				1.00638	0.976209	0.397282				1.013	1.00752	0.991549
1.24074	1.08139	1.60201	1.1276	1.2154				0.903949	1.00787	0.425429				0.980028	1.1373	1.10729
1.3264	1.2504	1.82233	1.35335	1.41314				0.937913	1.01189	0.387245				0.950353	0.956793	0.888619
1.21909	1.10178	1.61733	1.11479	1.31978				0.983243	1.03835	0.405611				0.958065	1.10829	0.855837
1.12357	1.20346	1.50502	1.11897	1.17656				0.962809	1.01897	0.387951				1.01364	1.03884	0.995273
1.12608	1.07343	1.72352	1.11155	1.19147				0.964929	0.734584	0.405303				1.06275	1.01289	1.15262
1.16017	1.08234	1.51651	0.810472	1.23414				0.678249	0.741343	0.369291				1.03571	1.0592	1.16434
1.12935	0.885361	1.63314	1.00755	1.105				0.803305	0.770237	0.406808				1.0575	1.0775	1.06537
1.13832	0.951339	1.76627	1.13541	1.32817				0.845068	0.982464	0.410708				1.03122	0.997585	1.27168
1.30742	1.4183	1.79607	1.02564	1.36977				0.872876	0.93805	0.407449				1.08705	1.0057	1.0626
1.23646	1.09067	1.65426	1.07756	1.30193				0.857821	0.825741	0.420189				0.951128	0.954474	0.963233
1.26709	1.15863	1.60478	1.13731	1.10052				0.768411	0.916701	0.410603				0.951407	0.853895	1.00139
1.01651	1.02143	1.64523	1.08161	1.20787				0.859018	0.752466	0.409569				1.04807	0.897178	1.06753
1.06411	0.929278	1.32996	0.880676	1.06121				0.977976	1.03373	0.365012				1.00584	0.850198	0.998088
1.24907	0.980275	1.33661	0.876124	1.07087				0.951208	0.976785	0.394141				1.0583	0.998194	1.07706
1.23305	1.03369	1.43831	1.04236	1.293				0.941335	0.983956	0.383443				1.04741	1.03143	1.04542
1.3054	1.14856	1.75684	1.36698	1.37157				0.885596	1.0411	0.411578				1.05595	1.03511	1.1523
1.07415	1.00321	1.61948	0.854486	1.18687				0.914633	1.02313	0.418056				0.914417	1.03284	1.1076
1.23583	1.16218	1.60533	1.02712	1.13083				0.90158	0.975928	0.421098				1.00367	0.996618	1.02523
0.978793	1.14583	1.56625	1.11244	1.11006				0.904204	1.16892	0.41078				0.964478	0.980975	0.953209
1.06062	1.00185	1.21395	0.766241	1.10235				0.912108	1.26946	0.423153				1.04466	1.042	0.936818
1.17361	1.08036	1.31825	0.885869	1.24185				0.827075	1.20869	0.398656				0.903691	0.949472	0.984791
1.24235	1.10851	1.46579	0.83877	1.2552				0.865869	1.22588	0.404315				1.08069	0.981625	1.02057
1.29041	1.02793	1.77147	0.924346	1.34303				0.924251	1.22377	0.38025				0.931001	0.997439	1.09199
1.22996	0.98077	1.71311	0.943701	1.21971				1.01055	1.22044	0.393349				0.966075	1.05901	1.02638
1.03817	1.0184	1.59674	0.972564	1.16558				1.00747	1.2449	0.389221				1.04453	1.06021	1.14315
1.06312	1.03225	1.63735	0.743908	1.17104				0.740741	1.22717	0.424147				1.02266	1.07016	1.06736
1.36611	0.960794	1.47914	1.28766	1.23591				0.824491	1.13266	0.403812				1.02707	0.987846	1.09522
1.25121	1.15922	1.48529	0.903268	1.10121				0.775327	1.16817	0.421478				1.02487	0.872658	1.18431
1.35321	1.16431	1.55868	1.06506	1.32664				0.87461	1.16745	0.426889				1.02041	0.814521	0.831893
1.37334	1.29608	1.70284	1.39341	1.36834				0.817274	1.17814	0.397799				0.983128	1.00589	0.972641
1.20826	1.10675	1.67387	0.851572	1.30423				0.795237	1.12746	0.389751				0.994517	0.881722	1.01417
1.159	1.11684	1.52488	1.21328	1.09822				0.830157	1.19879	0.410538				0.932425	1.07714	1.2201
1.15042	0.904054	1.38983	1.16697	1.20664				0.832002	1.17328	0.432993				0.987296	0.969003	1.1135
0.931669	0.99578	1.62491	1.04932	1.05164				0.796592	1.25652	0.402791				0.923488	1.00721	1.06984
1.19532	0.99278	1.7096	1.04762	0.982448				0.823444	1.27917	0.424703				1.06561	1.14135	1.20163
1.06167	1.05823	1.65538	0.996104	1.07753				0.749685	1.27424	0.439281				1.00006	0.975443	1.11621
1.3088	1.1768	1.92052	1.30477	1.36636				0.812471	1.29015	0.426025				0.983075	1.09459	0.81839
1.12808	1.04207	1.76887	1.09416	1.29828				0.843786	1.25886	0.413744				0.902472	1.17733	1.1611
1.25135	1.00803	1.7239	1.15434	1.16604				0.827317	1.23262	0.423362				0.960987	1.00277	1.12364
1.2106	1.08861	1.59264	1.18578	1.13928				0.784494	1.1572	0.406677				1.037	0.915504	1.12497
1.28358	1.2189	1.51886	0.816498	1.01563				0.860431	1.24671	0.387062				1.03282	0.966393	0.975642
1.39551	1.15057	1.46575	0.779775	1.25679				0.793333	1.25623	0.406723				1.094	0.947716	0.845057
1.10175	1.10719	1.67427	0.818932	1.26312				0.828966	1.27851	0.436193				1.00045	1.03021	1.17625
1.42466	1.24549	1.77713	1.27068	1.34986				0.826421	1.28335	0.405022				0.992311	0.902883	1.10088
1.20626	0.882577	1.69612	1.02531	1.13272				0.806131	1.26644	0.416439				1.05469	1.07977	1.09459
1.03722	0.943949	1.40814	0.94307	1.21556				0.776086	1.25277	0.441859				1.01261	1.00128	1.16397
1.09243	1.12998	1.45048	0.895093	1.11705				0.842811	1.07525	0.429061				1.06284	0.986613	1.10588
1.2095	1.09887	1.18856	0.997909	1.34194				0.76459	1.18333	0.422472				0.935963	0.812123	0.795043
0.883112	1.04905	1.34105	1.00715	1.35172				0.799366	1.06568	0.427576				0.852047	1.07165	1.09222
1.00752	1.09319	1.59081	0.95307	1.2519				0.865502	1.21028	0.430068				0.855724	0.914106	0.832628
1.34095	1.00497	1.91884	0.985432	1.36029				0.768837	1.18009	0.433765				1.00041	1.06568	1.09543
1.10003	1.11972	1.80518	0.924446	1.14869				0.813407	1.18134	0.428773				0.983904	1.02188	0.965578
1.04807	1.32666	1.83533	0.757506	1.1086				0.794812	1.19002	0.433942				0.813024	1.03563	0.957687
1.17435	1.13013	1.60353	1.16309	1.0376				0.755136	1.14622	0.427968				1.04233	1.07572	0.893051
0.96429	1.02203	1.41575	0.972425	1.08543				0.779855	1.20442	0.419312				0.964293	1.02457	0.896602
1.02284	0.935063	1.46838	1.2457	1.14634				0.79565	1.00875	0.417257				0.983095	0.984248	0.894846
0.990982	0.919306	1.31423	0.888002	1.26578				0.736796	1.21598	0.43953				1.04379	1.01814	0.836789
0.964334	1.24929	1.86161	1.30762	1.2996				0.761436	1.22434	0.419397				0.949339	1.00813	1.07356
1.04977	1.03788	1.48352	1.12809	1.10248				0.692977	1.2542	0.438116				0.981989	1.03824	0.949068
1.00761	0.999747	1.45662	1.00797	1.02062				0.783283	1.23767	0.440642				1.02516	1.08237	0.814912
1.02974	1.01931	1.62565	0.798109	1.09708				0.755829	1.21551	0.452759				0.932061	0.828315	1.06771
1.10899	1.01184	1.16886	1.18225	1.19371				0.781752	1.21434	0.441551				0.968758	0.932697	0.858063
1.14733	0.938966	1.51414	1.20245	1.01828				0.850231	1.23665	0.45592				1.04246	0.94176	0.866417
1.11017	1.13229	1.37171	1.09098	0.985619				0.739537	1.22732	0.415222				0.963107	1.09689	0.986322
1.24036	1.31493	1.72848	1.08982	1.44477				0.665275	1.22143	0.433641				0.920354	0.925753	1.00808
1.19025	1.02118	1.67658	0.995936	1.15864				0.750372	1.2247	0.440315				1.03195	1.06469	1.00245
1.02403	0.917179	1.64528	0.998947	1.04482				0.626789	1.18964	0.42804				1.06051	0.891156	1.06566
1.01352	1.04325	1.59569	1.10836	1.22475				1.01687	1.11398	0.429709				1.02058	1.00624	1.12501
1.12454	1.09879	1.36684	1.02101	1.13966				1.04016	1.06341	0.43618				0.947975	1.02502	0.814402
1.04681	1.12002	1.61647	1.03534	1.08474				1.06879	0.940569	0.426529				0.937169	1.08607	1.19157
1.04642	0.931795	1.84711	1.00165	1.13078				1.05461	0.839245	0.429682				0.92843	1.0506	1.05442
1.20148	1.09268	2.05054	1.35673	1.20133				1.01252	0.77481	0.414856				1.01763	1.10015	1.05487
1.02304	1.03331	1.24232	1.12694	1.05787				1.02031	0.819198	0.391622				1.02934	0.925753	0.884597
0.931135	1.00363	1.50286	0.968517	1.17091				0.999809	0.856388	0.409792				1.02217	0.917412	0.91608
0.995619	0.935461	1.71818	1.00796	1.17514				0.972558	0.920856	0.433078				0.94918	0.910515	0.871313
0.987433	0.983536	1.54199	0.905441	1.0767				0.961756	0.912657	0.447002				1.02012	1.07712	1.00689
0.982261	1.08405	1.33231	0.903262	1.10249				0.94513	0.900494	0.427615				1.09811	1.15029	1.13247
0.960707	1.12921	1.46586	0.945295	1.08248				0.958693	0.851068	0.44072				1.01894	1.00625	0.974012
1.05966	1.18917	1.71887	1.40239	1.2704				1.01702	0.909052	0.392682				1.09682	0.909866	0.931286
0.867582	1.10882	1.58837	1.05502	1.16274				0.981797	0.921091	0.418186				0.981346	1.0574	0.908309
1.06035	1.06769	1.45092	0.924851	1.11539				1.01636	0.919717	0.439464				0.985169	0.949843	1.11184
0.85625	1.08324	1.35837	0.927395	1.16683				1.03997	0.909255	0.419901				1.06174	1.08773	1.08988
0.958757	1.10919	1.66753	1.22474	1.19403				0.930127	0.877338	0.421805				1.02779	1.00781	1.20988
0.968823	1.04726	1.68309	1.15937	1.31064				1.06686	0.791017	0.420359				0.902075	1.07187	1.19238
1.27055	1.01597	1.65894	1.1824	1.24283				1.09939	0.874204	0.450214				1.0296	1.06434	1.13249
1.31325	1.01322	1.9648	1.37259	1.33568				1.01803	0.876305	0.430585				0.97759	0.822862	0.815694
1.18192	0.909436	1.8395	1.20745	1.30539				1.07585	0.705952	0.438273				1.04809	1.07933	0.857069
0.990273	0.984595	1.91978	0.740932	1.15373				1.05901	0.701143	0.441205				1.06728	0.930404	0.979624
1.03185	0.959754	1.75365	0.85084	1.10553				1.0318	0.820179	0.456842				0.892514	1.04966	1.11326
1.18964	1.15304	1.42059	0.917898	1.1564				0.759336	0.861223	0.461717				1.06915	0.932803	1.10399
1.22531	1.20883	1.5007	1.13857	1.21092				0.967284	0.831826	0.438404				0.98548	0.982115	1.09118
1.13511	1.15757	1.54109	0.891953	1.19598				0.969751	0.830569	0.40618				0.982844	1.02524	0.973668
1.337	1.2146	1.70249	0.914439	1.26914				0.962037	0.916675	0.425501				0.9899	1.08346	0.883954
1.06451	1.17395	1.44837	0.921352	1.2294				0.971675	0.972813	0.426463				1.05396	1.06475	0.877263
0.925244	0.920725	1.41035	0.981687	1.12719				0.987888	0.840776	0.440943				0.872188	1.03269	0.823744
1.15975	0.961173	1.24665	0.950745	1.15116				1.00008	0.841162	0.437429				1.0127	1.04975	1.00429
0.936645	1.0623	1.26061	1.20576	0.973174				1.00262	0.757321	0.423009				0.92364	0.99412	0.999268
1.05505	1.05093	1.31847	1.20295	0.989358				1.02546	0.832899	0.411179				0.987196	0.97596	1.17678
1.0971	1.08509	1.32682	1.15854	1.0641				0.959727	0.872065	0.409079				1.05452	1.14159	0.937639
1.30897	1.26511	1.74897	1.36784	1.18965				0.978263	0.821017	0.400534				0.982791	1.19701	0.935625
1.08227	0.941172	1.6704	0.996286	1.09012				0.989792	0.878438	0.399519				1.03885	1.07352	1.22636
1.1229	0.979458	1.49711	0.919378	1.08692				0.972113	0.875173	0.429342				0.988329	0.950519	0.988912
1.11574	1.02054	1.42913	1.18179	1.11476				0.935944	0.947891	0.399447				1.03297	1.06285	1.15062
1.14422	0.968593	1.24987	1.12764	1.20037				0.921124	0.933058	0.406579				1.03948	1.14621	0.913742
1.15219	0.789618	1.46235	1.29481	1.08881				0.872091	0.940622	0.413299				0.899405	1.0487	1.18555
1.08278	1.00897	1.53155	1.18608	1.15888				0.948454	0.957306	0.414064				1.05546	0.918704	0.969507
1.2533	1.20833	1.80551	1.33097	1.29395				0.901966	0.831845	0.397439				1.04593	1.04366	0.839247
1.06045	1.09833	1.6084	1.20399	1.22401				0.953642	0.874505	0.397295				1.0331	0.991947	1.09711
1.08037	0.972842	1.41235	1.08182	1.06609				0.936231	0.807178	0.438385				1.03033	1.06313	1.07924
1.02166	1.04431	1.55098	0.961643	1.17179				0.838355	0.858325	0.429571				0.955653	1.05672	0.920884
1.00213	1.11793	1.38457	1.02536	1.01799				0.953917	0.888147	0.435394				0.98187	1.02107	1.09259
1.15634	1.14782	1.43121	1.11594	1.14046				0.878254	0.882429	0.425397				1.02733	0.956117	1.00155
1.01425	0.962825	1.40883	0.896428	1.20077				0.915654	0.904583	0.406023				1.07579	1.01345	1.1836
1.27328	1.21891	1.54967	0.852146	1.33731				0.956246	0.944011	0.416963				1.05635	0.953858	1.02428
1.08594	1.18924	1.21394	1.08622	1.17685				1.00245	0.892361	0.431842				1.05869	0.984738	1.09806
1.00763	1.02891	1.27184	0.97074	0.990282				0.988791	0.912827	0.408202				0.954865	0.984036	1.12288
0.986627	0.970357	1.4427	1.02385	1.14607				0.974593	0.935603	0.424422				0.984871	0.812322	0.817072
								0.973814	0.766337	0.402804				1.06958	1.07698	0.929444
								0.992854	0.731705	0.412762				0.957263	1.06991	1.12378
								0.996623	0.785698	0.423185				1.01543	1.00203	1.05896
								0.960813	0.724737	0.413757				1.06581	0.809917	1.11707
								0.963692	0.731954	0.417663				1.01762	1.02615	0.947299
								0.97685	0.74943	0.439981				0.812202	0.834695	1.01631
								0.939038	0.738916	0.452596				1.00701	0.847495	1.03261
								0.858187	0.74699	0.422747				1.04764	0.928066	1.1216
								0.921019	0.610948	0.413947				1.00335	1.04641	1.13254
								0.938155	0.618388	0.388135				1.02739	1.11802	0.887141
								0.90934	0.594506	0.437541				1.08242	1.09908	1.04712
								1.00687	0.824759	0.447159				1.00959	1.04219	0.847588
								0.873949	0.807172	0.440596				1.00483	1.1025	1.09808
								0.929859	0.880348	0.435041				1.01488	1.09999	0.832297
								0.825034	0.847228	0.432064				1.06193	0.928178	1.08307
								0.909301	0.885177	0.425907				1.03516	0.994385	1.21376
								0.913357	0.863749	0.412605				0.99461	1.01829	0.980061
								0.881532	0.786018	0.437815				1.08247	0.994908	1.02419
								0.969784	0.826722	0.418932				0.993119	1.07095	0.838253
								0.889822	0.838421	0.416538				0.962756	1.11057	1.00764
								0.913907	0.828338	0.427124				0.900127	1.12634	0.83871
								0.853954	0.893539	0.413103				0.984381	0.868305	0.907666
								0.893781	0.699507	0.424481				0.989018	0.956409	1.15384
								0.94248	0.729271	0.413868				0.99783	0.990748	0.861554
								0.923427	0.673565	0.421837				0.934929	1.04376	1.15207
								0.909392	0.715001	0.421641				0.988323	1.03787	1.11631
								0.876416	0.720491	0.413711				0.908104	1.14662	1.07234
								0.87408	0.72072	0.430271				0.88781	0.989164	0.930252
								0.827514	0.707202	0.445032				1.01876	0.997545	0.979968
								0.856767	0.792293	0.447793				0.932359	1.04698	1.047
								0.773888	0.724744	0.426136				1.02452	0.905149	1.08277
								0.805248	0.797253	0.419796				1.02112	1.21639	1.2063
								0.903144	0.708805	0.422649				0.801257	0.971176	0.931809
								0.715629	0.691302	0.427549				0.990999	1.183	0.817012
								0.733727	0.773613	0.434001				0.905911	0.847436	1.14424
								0.795754	0.775262	0.416884				1.06785	1.08687	0.889725
								0.779665	0.713058	0.373073				0.974681	1.02874	1.00586
								0.863245	0.732497	0.410217				0.943847	1.03324	1.16327
								0.86403	1.02128	0.406704				1.03151	1.19625	0.812567
								0.753506	1.02056	0.427844				1.05809	1.0333	1.08716
								0.769066	0.933876	0.398185				0.981757	1.07691	1.12317
								0.742822	1.0219	0.409118				0.928602	0.84939	1.16453
								0.784363	1.06535	0.40881				1.02533	1.19445	1.12396
								0.790382	1.03761	0.440145				0.944563	1.01559	0.989707
								0.810201	1.03471	0.429571				1.00391	1.04764	0.904519
								0.696596	0.836543	0.462371				1.04354	0.818357	0.968626
								0.74203	0.92117	0.452596				1.05026	0.997618	1.06657
								0.764629	0.984146	0.400219				1.07448	0.984334	0.972992
								0.716388	0.941243	0.429715				1.01162	0.968712	1.13259
								1.04458	1.01322	0.420555				1.05554	1.06093	0.853193
								1.107	0.942297	0.424121				0.969043	1.04096	0.94928
								0.985238	1.0665	0.443239				1.0043	0.84774	1.01963
								0.998946	1.05661	0.453944				1.08373	0.908574	0.952738
								1.00406	1.02047	0.420503				0.992503	1.02907	1.15386
								0.887735	0.952896	0.424533				1.04941	1.0618	1.06628
								1.02573	0.85911	0.404669				1.0027	0.797302	1.07528
								1.07197	1.04772	0.456718				0.955627	1.08858	0.807081
								1.12742	1.04621	0.45397				0.945755	1.09317	0.841433
								1.05043	1.01414	0.430775				1.00375	1.08626	0.803848
								1.06937	0.914705	0.42433				0.948505	1.08466	0.799203
								1.03508	1.10567	0.430369				1.08695	0.996737	1.00852
								1.02951	0.963156	0.441362				1.01092	1.05796	1.18045
								1.07248	0.979441	0.438777				0.959927	1.07789	0.806776
								1.05429	0.954931	0.419462				1.05221	1.00208	1.00615
								1.05705	1.04307	0.44992				1.06903	1.0259	1.12957
								1.04694	1.05552	0.413011				0.83922	1.10113	0.810115
								0.93754	1.00912	0.407456				0.811142	1.11199	1.17536
								1.05046	0.975692	0.415281				1.04267	1.18316	1.01605
								1.05527	1.07286	0.422394				1.04036	1.19363	1.16261
								1.07445	0.801944	0.438633				1.04104	1.0682	1.02974
								1.03953	1.04752	0.39422				1.04237	0.988131	0.972342
								0.996544	1.05687	0.397157				1.05933	1.1099	1.10497
								1.00599	1.06153	0.401764				0.96683	1.09857	1.08467
								1.04987	0.973212	0.412946				0.979942	1.14971	0.825287
								1.07209	1.03232	0.433791				1.01278	1.01221	0.818934
								1.08952	0.941584	0.435604				1.01932	0.954607	0.98868
								1.09948	0.930428	0.428145				1.04013	0.957727	0.818457
								1.05087	1.07166	0.400311				0.999718	1.04523	0.994113
								1.04257	1.14716	0.388095				0.966545	1.01336	1.07218
								1.06074	1.07746	0.39863				0.986408	0.983155	0.871572
								1.06162	1.16126	0.389581				0.974244	1.01594	1.12681
								1.04356	1.00548	0.406671				1.09673	0.910959	1.02458
								1.05305	1.08131	0.407796				1.07406	1.14583	1.15392
								1.07938	0.969103	0.425515				1.07721	1.07038	1.13727
								1.00434	1.09592	0.430945				1.05836	1.16392	0.797521
								1.01305	1.14769	0.437979				0.991788	1.16929	0.994067
								1.04339	1.0063	0.423669				0.918678	1.08797	1.17539
								0.932489	1.09623	0.411225				1.10806	1.02165	1.09893
								0.952497	1.08354	0.393598				0.977272	0.962438	1.13538
								1.03219	1.14726	0.399238				1.02744	0.956031	1.13318
								1.01155	0.919436	0.422151				0.937169	1.0893	0.852199
								1.058	0.973016	0.4136				1.04741	1.12939	1.09847
								1.01363	0.888193	0.411179				0.883709	0.95672	1.05994
								1.02452	0.982359	0.403975				1.02409	0.990887	1.01048
								0.945516	0.945987	0.403183				0.876474	0.895721	1.12364
								0.958824	1.03894	0.451627				1.02883	1.08638	0.875653
								1.08626	1.07944	0.43387				1.07487	0.96104	1.10128
								1.07206	1.08492	0.427988				1.03285	1.01361	1.11475
								1.07909	1.09567	0.377123				1.04588	1.01658	1.07611
								1.05383	1.1119	0.41678				1.07757	1.20919	1.01199
								1.09445	1.16384	0.420915				1.10118	1.12592	1.08695
								1.09574	1.02989	0.42679				0.887983	1.12197	1.04662
								1.10599	0.996054	0.409124				0.982923	1.02655	1.11839
								1.05393	1.04933	0.439045				0.912914	0.863741	1.17355
								1.07715	1.01035	0.427085				1.03356	1.05728	1.21622
								0.982484	0.918716	0.439019				1.05566	1.03261	1.14194
								1.09881	1.01012	0.417427				1.08334	1.10241	1.1077
								1.10432	1.00601	0.414555				1.02569	0.902896	1.10354
								1.04825	1.04942	0.393107				1.01944	0.978517	1.06869
								1.05335	1.09444	0.459872				1.04949	1.17714	1.1133
								1.09205	1.06811	0.441859				1.0718	1.08929	0.874864
								1.0117	1.10053	0.430441				0.998347	1.03362	0.99147
								1.0478	0.988196	0.43578				1.04218	1.0865	1.07937
								1.09926	1.00871	0.469169				0.950877	1.13089	0.880357
								1.07992	0.986351	0.420136				1.02252	1.03479	0.842983
								1.07855	0.839075	0.432038				1.00249	1.05226	0.963882
								1.04322	0.993378	0.439831				0.952785	0.856989	1.05387
								1.05788	0.926057	0.42772				0.885438	1.16117	1.1475
								1.04942	0.927398	0.446439				0.926926	1.05027	1.10807
								1.07217	0.776596	0.426594				0.818708	0.880277	1.17345
								1.10485	1.08327	0.420928				1.00212	0.999592	0.913477
								1.00632	1.086	0.422243				0.987879	1.00389	1.17847
								1.00157	1.02815	0.421438				1.01874	1.00445	1.01652
								1.03754	0.893329	0.433144				1.05902	1.0509	1.09465
								1.0762	0.8998	0.446112				1.10741	0.955978	1.12281
								1.00822	0.854065	0.42679				1.04291	0.987475	1.10598
								0.997009	0.73974	0.420247				1.02587	0.97594	1.09441
								1.01765	0.742737	0.46279				0.935466	0.825148	1.04005
								1.05926	0.688842	0.434943				0.968765	1.05149	1.07513
								1.10037	0.620567	0.44619				0.981432	0.987157	0.984314
								1.10816	0.728833	0.416897				0.988627	1.06179	1.04482
								1.03531	0.879426	0.434289				0.985023	1.1311	1.12058
								1.034	0.867537	0.453617				0.845335	0.983022	1.11846
								1.1155	0.898367	0.439006				1.00966	0.931173	0.935281
								1.01882	0.800694	0.428812				1.03066	0.983957	0.941064
								1.00746	0.856218	0.44356				1.07621	0.882192	1.03048
								1.1167	0.831747	0.464367				1.00726	0.918028	1.03716
								1.07136	0.676385	0.456502				1.01985	1.05427	1.09698
								1.05939	0.859057	0.446923				0.975304	0.922447	1.05976
								1.03047	0.794871	0.474031				0.952314	0.965923	1.06393
								1.0393	0.821481	0.452491				1.00241	0.99522	0.845402
								1.00987	0.779397	0.457379				1.08577	1.07189	1.07967
								1.07221	0.769484	0.481424				1.06362	0.970845	1.16469
								1.03766	0.69019	0.440275				0.973535	0.828554	0.859924
								1.06069	0.829856	0.439909				0.980498	0.988349	1.01207
								1.15609	0.737156	0.451948				1.00871	0.944695	1.05771
								1.136	0.799137	0.460297				0.949691	0.977775	0.886048
								1.16107	0.830955	0.458354				0.981227	0.969182	1.096
								1.12683	0.735297	0.471701				1.07191	1.02509	1.12863
								1.10085	0.847849	0.434688				1.05016	0.996876	1.02788
								1.07708	0.862276	0.454107				1.09496	1.07116	0.829819
								1.11991	0.624689	0.447695				1.02612	0.883385	0.829137
								1.0832	0.723814	0.447636				0.980724	0.983009	1.06376
								1.12842	0.859234	0.421582				1.03051	1.07078	1.05426
								1.08156	0.905558	0.467861				0.968699	1.07783	1.03687
								1.07904	0.930814	0.477053				1.05882	0.960059	0.855373
								1.05186	0.872601	0.450253				0.948558	0.88836	1.11479
								1.0682	0.755548	0.458269				0.916842	0.900544	1.1428
								1.07933	0.889842	0.476471				0.915935	1.06017	0.984414
								1.17717	1.02502	0.477466				1.01887	0.834748	1.14502
								1.14813	1.05906	0.436723				0.995915	1.05112	0.830329
								1.09319	0.91606	0.426594				1.03526	1.05075	1.03693
								1.11427	0.973467	0.458105				1.05976	1.064	1.03301
								1.09636	0.745917	0.476065				0.936082	0.905652	0.972853
								1.03599	1.10341	0.455292				0.98878	1.04659	1.17465
								0.974769	0.808454	0.46737				1.06074	1.04849	1.13702
								1.07204	0.878065	0.443344				0.962802	1.02534	1.16001
								0.862021	0.811994	0.421792				1.03706	0.981916	1.20396
								0.876252	0.773698	0.50104				0.980511	1.075	1.18521
								1.09156	0.965812	0.516658				1.01598	1.07921	1.0181
								1.01358	0.874891	0.495027				1.04184	1.0133	1.09443
								1.10637	0.997277	0.468868				1.02516	1.09386	1.01478
								0.941708	1.03349	0.491854				1.03053	1.01715	0.932286
								1.08506	0.723474	0.471485				1.03058	1.16897	0.962842
								1.16805	0.997447	0.467998				1.03228	1.01283	0.905096
								1.14443	0.979722	0.474724				0.989827	0.797978	0.972886
								1.11101	0.88432	0.475935				1.08969	1.06732	0.889526
								1.13416	0.739217	0.457117				1.04056	1.16666	1.0627
								1.11037	1.01333	0.476981				0.833913	1.0289	1.16896
								1.13552	0.785299	0.458524				1.01574	1.12853	1.17224
								1.15476	0.783427	0.490028				1.01902	0.971561	1.03787
								1.08143	0.925318	0.450914				0.817681	0.944304	1.14508
								1.10486	1.01419	0.509938				1.10429	0.946762	1.12669
								1.12958	0.950142	0.513491				0.950843	1.01197	0.835908
								1.05832	1.03072	0.491736				0.988985	1.01005	1.03184
								1.09844	1.02886	0.486652				0.930941	0.908481	1.1137
								1.07561	1.04315	0.490512				0.869889	1.03535	0.812547
								1.09988	0.752093	0.466689				1.05548	0.926158	0.838531
								1.06903	0.958582	0.463941				0.999029	1.05702	1.07856
								1.11932	0.989367	0.463294				1.02575	1.15762	0.991119
								1.13585	0.972388	0.462044				1.0632	1.02352	0.977729
								1.11682	0.995759	0.502447				1.06015	0.857301	1.20679
								1.13863	1.00725	0.471093				1.02951	0.928251	1.1358
								1.12411	1.01986	0.480534				0.91249	1.00779	0.838637
								1.12	0.765467	0.476766				1.01273	1.06433	0.82065
								1.14478	0.779587	0.439274				0.900074	1.03533	0.983831
								1.16917	0.793726	0.444123				0.861866	0.812381	1.11251
								1.16215	0.827802	0.425868				1.07268	1.12773	1.16918
								1.14555	0.734421	0.416531				0.969301	0.901445	0.958529
								1.13581	0.815128	0.444483				1.04012	1.03336	0.916869
								1.12076	0.924199	0.438103				1.01248	1.08632	1.02689
								1.11546	0.874283	0.457071				0.993815	1.09105	1.02909
								1.10511	0.891255	0.435656				1.06819	0.992589	0.879754
								0.98849	0.838244	0.476563				1.07955	0.852444	1.0255
								1.02705	0.878745	0.441257				0.97916	0.984016	1.23069
								1.08314	0.834881	0.429964				0.904321	0.972376	1.03759
								1.03386	0.895188	0.44004				0.968891	0.962133	0.859858
								1.02672	0.83564	0.454317				0.91608	1.01242	0.851239
								0.963934	0.901613	0.438018				1.03359	0.975728	1.04841
								1.08501	0.885497	0.444175				0.977172	0.971183	1.11518
								0.989085	0.849243	0.401436				0.954348	0.998526	1.12152
								1.10565	0.830628	0.430513				0.956853	1.03464	0.820159
								1.07463	0.778625	0.436952				0.885531	0.926588	0.959675
								1.02327	0.706129	0.45187				1.00973	1.18497	1.07546
								1.01395	0.687082	0.43561				1.06681	0.934439	0.965022
								1.02682	0.853306	0.459204				0.975397	0.960119	1.19659
								1.07808	0.849609	0.471217				1.07341	0.936963	1.12852
								0.996989	0.725123	0.478257				0.917352	1.17999	0.856327
								1.07281	0.84003	0.424003				1.08682	1.16403	1.11628
								1.03247	0.920947	0.447185				1.00201	0.998347	1.1496
								1.0534	0.919652	0.440413				0.979127	0.862535	1.01277
								1.05183	0.937403	0.480044				1.09449	1.17795	1.04643
								1.06137	0.857206	0.451968				1.06214	1.06341	1.14446
								1.0742	0.930925	0.471531				1.06228	1.00218	0.827328
								0.974698	0.831865	0.471021				0.967943	1.04827	1.11123
								1.04564	0.899153	0.471413				0.96098	1.06261	1.19866
								1.01725	0.893735	0.448847				1.06993	0.8671	1.09983
								1.09052	0.873799	0.455023				1.0456	1.0605	1.02317
								1.08052	0.904773	0.433314				1.07864	1.2031	0.96893
								1.01984	0.915543	0.44496				1.07755	1.01377	1.19854
								0.866418	0.714864	0.464753				1.07167	1.09386	0.820047
								0.882291	0.726235	0.452419				1.01969	0.852643	0.990854
								0.998141	0.694757	0.42594				1.04819	0.910668	0.990569
								1.00131	0.633437	0.431972				0.993086	1.02792	0.860044
								0.905048	0.740512	0.421478				1.05387	1.12561	0.947478
								1.05405	0.776793	0.428956				0.804292	0.991589	1.14878
								1.03305	0.74008	0.424062				0.83347	1.11414	1.07324
								1.06382	0.768156	0.403831				0.993192	1.10781	1.16429
								1.0468	0.686775	0.409196				1.02853	1.04894	1.01943
								1.07378	0.710951	0.408791				1.03422	1.05302	1.08415
								1.09888	0.696321	0.426974				0.963769	1.03014	0.925243
								1.09876	0.780398	0.398015				0.942184	0.985414	1.09636
								1.06534	0.784049	0.435113				1.05458	1.07794	1.08787
								1.02509	0.719018	0.425986				1.05379	1.00624	1.14488
								1.04365	0.748305	0.410976				0.932677	1.09515	0.8639
								1.03069	0.686297	0.433687				0.991768	1.01686	1.03789
								1.08506	0.800472	0.42045				1.06416	0.902823	1.03549
								1.08322	0.841326	0.416858				1.03501	1.21387	1.07276
								1.04993	0.628464	0.411146				1.0272	1.10834	0.819934
								0.978303	0.763262	0.445418				1.10833	1.07521	1.08143
								0.982654	0.744765	0.458956				0.899418	1.05353	1.05202
								1.08005	0.705442	0.451307				1.10332	0.940594	1.18407
								1.07493	0.683261	0.428851				0.955117	0.982903	1.02829
								1.03045	0.796474	0.445359				0.913139	1.01794	0.965048
								1.02713	0.728624	0.463385				0.977225	1.0506	1.06457
								0.976732	0.76444	0.414928				1.05757	1.13074	1.12035
								1.0236	0.746813	0.432215				1.06887	0.899464	0.947988
								1.02944	0.774032	0.424474				1.02406	1.08467	1.06111
								1.02314	0.838925	0.457019				0.965499	1.06308	1.11186
								1.00236	0.761966	0.43845				1.01511	1.02595	1.04501
								0.955873	0.83174	0.408287
								1.03735	0.842288	0.416276
								1.03069	0.873714	0.472107
								1.00954	0.730069	0.41642
								1.05927	0.694927	0.446053
								0.975548	0.626737	0.430324
								1.02098	0.73037	0.433791
								0.98639	0.770256	0.440308
								0.896411	0.731247	0.412442
								0.948774	0.713444	0.43949
								1.00468	0.768457	0.432247
								1.0265	0.820467	0.451202
								1.02931	0.818491	0.419122
								0.958491	0.62266	0.399205
								1.03177	0.844859	0.399094
								0.906919	0.692075	0.43243
								0.971112	0.671307	0.478866
								1.0075	0.655048	0.479003
								0.984754	0.758446	0.457156
								0.957993	0.865646	0.495596
								0.905368	0.805117	0.45817
								0.852462	0.70397	0.461841
								0.909818	0.747742	0.475836
								0.943933	0.729854	0.462901
								0.98762	0.645999	0.443416
								0.950194	0.704918	0.45028
								0.872248	0.75823	0.452687
								0.942428	0.68951	0.458033
								0.91941	0.700024	0.466742
								0.901102	0.706175	0.479762
								0.88411	0.702177	0.447898
								0.974383	0.767731	0.444411
								0.883561	0.764891	0.452249
								0.884915	0.652424	0.462711
								0.947361	0.657973	0.462908
								0.912481	0.702098	0.444986
								0.914476	0.760985	0.457405
								0.979022	0.681109	0.438738
								0.991886	0.750706	0.469686
								0.974455	0.699763	0.527316
								0.93843	0.677294	0.478238
								0.993921	0.722591	0.502604
								1.13914	0.668945	0.502643
								1.15721	0.592052	0.485821
								1.151	0.659386	0.532557
								1.17123	0.765081	0.541462
								1.15259	0.738444	0.541868
								1.1786	0.704153	0.546441
								1.16435	0.537752	0.576873
								1.18314	0.699102	0.460493
								1.17677	0.733302	0.54932
								1.14986	0.766808	0.52411
								1.19319	0.908064	0.526001
								1.18127	0.785429	0.551931
								1.2027	0.895292	0.548077
								1.16957	0.856918	0.491441
								1.17344	0.847987	0.564997
								1.21719	0.806452	0.534815
								1.20651	0.675658	0.534409
								1.18316	0.682463	0.539087
								1.18625	0.704755	0.560038
								1.1786	0.776793	0.550263
								1.133	0.762137	0.538603
								1.07589	0.70183	0.556936
								0.990636	0.801309	0.597005
								0.840475	0.673532	0.512183
								1.15333	0.653007	0.553128
								1.17252	0.783931	0.54917
								1.18524	0.786568	0.528409
								1.14992	0.690229	0.555647
								1.082	0.708903	0.550007
								1.113	0.857605	0.535011
								1.14249	0.843642	0.550112
								1.10696	0.890823	0.577795
								1.07206	0.818066	0.567641
								1.16475	0.863166	0.424474
								1.15224	0.884385	0.435192
								1.13259	0.781222	0.476321
								1.17122	0.84323	0.505005
								1.16443	0.888402	0.449069
								1.04643	0.664149	0.451641
								1.0753	0.834057	0.453316
								1.05963	0.621339	0.420974
								1.15208	0.897759	0.448938
								1.14499	0.870036	0.502159
								1.08544	0.792686	0.481136
								1.19357	0.633424	0.451582
								1.15146	0.870292	0.519131
								1.11851	0.859214	0.464465
								1.18727	0.904014	0.434838
								1.11118	0.909183	0.440151
								1.02473	0.799634	0.451026
								1.07701	0.883934	0.437783
								1.09087	0.80424	0.463791
								1.08349	0.931115	0.41608
								1.07981	0.951889	0.474377
								0.925979	0.909072	0.47282
								1.07583	0.936192	0.47282
								1.09405	0.808722	0.492704
								1.12322	0.843093	0.45469
								1.10079	0.871371	0.436271
								0.983347	0.727721	0.423427
								1.08065	0.79173	0.420686
								1.13914	0.772278	0.440936
								1.03109	0.708177	0.455174
								1.00771	0.69992	0.434505
								1.08629	0.761705	0.472094
								0.92558	0.745825	0.445981
								0.984649	0.743993	0.488863
								0.968266	0.779161	0.431495
								1.08318	0.788864	0.422557
								1.06816	0.836608	0.431194
								1.07829	0.872333	0.453734
								1.09536	0.817006	0.431514
								0.702903	0.874263	0.423957
								0.9781	0.845513	0.41377
								1.07176	0.820886	0.468345
								1.07106	0.807303	0.43368
								1.078	0.959753	0.463477
								1.0673	0.970621	0.419829
								0.987306	0.991277	0.44199
								1.01613	0.934079	0.479291
								1.04222	0.759755	0.388789
								1.04372	0.730482	0.495969
								1.01828	0.71239	0.485847
								1.00875	0.801734	0.534304
								0.979441	0.807178	0.461265
								1.03928	0.80778	0.519053
								1.09352	0.833239	0.499123
								1.09672	0.799778	0.419037
								1.04872	0.828561	0.510658
								1.05411	0.815115	0.41148
								1.00811	0.737437	0.49203
								0.826166	0.670071	0.48516
								0.952	0.741212	0.47774
								1.12329	0.667911	0.449841
								1.08347	0.698683	0.499299
								0.839814	0.790402	0.527434
								1.03543	0.649388	0.496015
								0.936408	0.750595	0.48024
								1.04142	0.718587	0.431671
								0.87919	0.769661	0.48198
								1.08432	0.706305	0.458
								1.11739	0.782531	0.476517
								1.03752	0.802945	0.479101
								1.02599	0.755613	0.490977
								1.11586	0.75295	0.468685
								1.07323	0.764989	0.47725
								1.11531	0.722421	0.482026
								1.06029	0.782289	0.50369
								1.08149	0.74695	0.470393
								1.0425	0.795486	0.428021
								1.05258	0.78045	0.474181
								1.11288	0.743594	0.472506
								1.07662	0.748422	0.474246
								1.12566	0.776282	0.473749
								1.08702	0.799268	0.479729
								0.822404	0.820513	0.496748
								1.04836	0.817523	0.463928
								0.996407	0.773685	0.476177
								0.976785	0.785835	0.45874
								0.962645	0.838277	0.485926
								1.07522	0.842052	0.463719
								0.910995	0.891366	0.473337
								1.05198	0.736756	0.466101
								0.981842	0.805464	0.492442
								1.04037	0.886845	0.501426
								1.04744	0.767515	0.50155
								1.02009	0.817797	0.479474
								1.0572	0.836563	0.532924
								1.02966	0.763367	0.555896
								1.07251	0.83988	0.709727
								1.04112	0.759559	0.662193
								1.05363	0.805366	0.681024
								1.06897	0.810352	0.599943
								1.03644	0.807401	0.626279
								1.06869	0.774019	0.667054
								0.969496	0.679427	0.634824
								1.1253	0.764381	0.568831
								1.06767	0.919828	0.596253
								1.05798	0.90601	0.627587
								1.09381	0.934655	0.748311
								1.09204	0.900409	0.741906
								1.04909	0.811745	0.724482
								1.07113	0.877744	0.745066
								1.00318	0.821187	0.589946
								NA	0.821128	0.658562
								NA	0.812426	0.627018
								NA	0.738673	0.626782
								NA	0.827317	0.667604
								NA	0.706129	0.62726
								NA	0.874649	0.63239
								NA	0.965701	0.700639
								NA	0.801649	0.738739
								NA	0.850427	0.704277
								NA	0.8265	0.681462
								NA	0.83121	0.623936
								NA	0.855524	0.5677
								NA	0.819499	0.606552
								NA	0.860615	0.505954
								NA	1.0297	0.517999
								NA	1.02215	0.561726
								NA	1.0196	0.663835
								NA	1.02885	0.6636
								NA	1.00543	0.631186
								NA	1.07463	0.575754
								NA	1.08752	0.574027
								NA	1.09137	0.538603
								NA	1.08323	0.594643
								NA	1.10972	0.508767
								NA	1.03222	0.508309
								NA	0.835849	0.510193
								NA	0.914784	0.63394
								NA	0.953701	0.59128
								NA	0.81009	0.594578
								NA	0.858194	0.545244
								NA	0.794609	0.636715
								NA	0.73391	0.535489
								NA	0.821435	0.561412
								NA	0.98902	0.590319
								NA	0.958621	0.611354
								NA	1.00657	0.615555
								NA	1.03411	0.569617
								NA	1.05067	0.611858
								NA	1.06932	0.566967
								NA	1.06918	0.619356
								NA	0.881186	0.682031
								NA	0.910014	0.677039
								NA	0.842648	0.670771
								NA	0.917178	0.693651
								NA	0.85277	0.656867
								NA	0.868695	0.588061
								NA	0.891425	0.560254
								NA	0.897628	0.547207
								NA	0.905715	0.629897
								NA	0.872896	0.611256
								NA	0.855236	0.614985
								NA	0.816057	0.615136
								NA	0.80939	0.608972
								NA	0.909405	0.668114
								NA	0.906252	0.534684
								NA	0.902843	0.612427
								NA	0.895744	0.581715
								NA	0.843119	0.633293
								NA	0.823019	0.606074
								NA	0.858743	0.652051
								NA	0.881565	0.543811
								NA	0.856283	0.637232
								NA	0.775268	0.615293
								NA	0.782053	0.507112
								NA	0.89522	0.386532
								NA	0.885857	0.408045
								NA	0.873694	0.42895
								NA	0.906546	0.514368
								NA	0.808147	0.422681
								NA	0.869572	0.478081
								NA	0.854261	0.399585
								NA	0.797743	0.5257
								NA	0.862512	0.498783
								NA	0.854844	0.466774
								NA	0.764067	0.397668
								NA	0.911185	0.388043
								NA	0.88905	0.467311
								NA	0.869951	0.398564
								NA	0.779992	0.392675
								NA	0.736998	0.429224
								NA	0.79317	0.397367
								NA	0.827677	0.495864
								NA	0.832931	0.485788
								NA	0.78365	0.420601
								NA	0.858233	0.494575
								NA	0.876017	0.420529
								NA	0.881912	0.399761
								NA	0.867216	0.471433
								NA	0.83901	0.458458
								NA	0.878784	0.410629
								NA	0.764145	0.384922
								NA	0.807721	0.407168
								NA	0.876311	0.41379
								NA	0.874499	0.385145
								NA	0.8293	0.386178
								NA	0.840933	0.51039
								NA	0.638377	0.378327
								NA	0.690269	0.396117
								NA	0.686441	0.381435
								NA	0.784127	0.497186
								NA	0.692284	0.479716
								NA	0.625153	0.423408
								NA	0.77199	0.393474
								NA	0.775805	0.404126
								NA	0.854359	0.445032
								NA	0.871286	0.403844
								NA	0.839402	0.490224
								NA	0.848255	0.389744
								NA	0.747879	0.409033
								NA	0.811385	0.46315
								NA	0.824772	0.460709
								NA	0.716441	0.391275
								NA	0.740846	0.424468
								NA	0.833409	0.387997
								NA	0.828646	0.417938
								NA	0.828358	0.396706
								NA	0.875467	0.425665
								NA	0.914836	0.404564
								NA	1.047	0.394619
								NA	1.02448	0.40917
								NA	1.01903	0.43512
								NA	0.908208	0.41163
								NA	0.95925	0.453571
								NA	0.922288	0.466277
								NA	0.829418	0.469673
								NA	0.93616	0.445045
								NA	1.02462	0.436546
								NA	0.94316	0.427438
								NA	1.01581	0.41148
								NA	1.05476	0.466205
								NA	1.07174	0.446203
								NA	1.09937	0.438182
								NA	1.05171	0.402765
								NA	0.979454	0.398499
								NA	0.975522	0.396621
								NA	1.02802	0.381166
								NA	1.06832	0.389921
								NA	1.09118	0.425639
								NA	1.05732	0.392322
								NA	1.02501	0.387873
								NA	0.902457	0.379871
								NA	0.889626	0.396261
								NA	0.865528	0.406619
								NA	0.800105	0.37796
								NA	0.738019	0.405755
								NA	0.984963	0.4721
								NA	0.98936	0.38695
								NA	0.99521	0.667722
								NA	0.9312	0.672413
								NA	0.945287	0.743312
								NA	0.92556	0.692304
								NA	0.839559	0.664653
								NA	0.970752	0.649074
								NA	0.962901	0.648629
								NA	1.07796	0.723055
								NA	0.874165	0.689327
								NA	0.942251	0.723664
								NA	0.856146	0.753703
								NA	1.03709	0.738242
								NA	1.01233	0.56804
								NA	0.849197	0.633221
								NA	0.787497	0.653419
								NA	0.84817	0.684714
								NA	0.845265	0.642911
								NA	0.800517	0.715525
								NA	0.725293	0.715525
								NA	0.894487	0.59289
								NA	0.923172	0.724737
								NA	0.946524	0.678851
								NA	0.902385	0.700273
								NA	0.771342	0.658503
								NA	0.870187	0.664051
								NA	0.89469	0.657508
								NA	0.738516	0.658136
								NA	0.707948	0.685898
								NA	0.876854	0.656533
								NA	0.896169	0.661545
								NA	0.894932	0.658915
								NA	0.83846	0.708255
								NA	0.833409	0.674376
								NA	0.855694	0.717232
								NA	0.861969	0.689392
								NA	1.00512	0.679564
								NA	0.98304	0.660158
								NA	0.881977	0.637873
								NA	0.989825	0.534344
								NA	0.805026	0.595049
								NA	0.960408	0.562661
								NA	0.896018	0.636217
								NA	1.0051	0.564081
								NA	0.908823	0.598805
								NA	0.930408	0.6093
								NA	0.815553	0.660753
								NA	0.944548	0.666066
								NA	0.864442	0.583697
								NA	0.833808	0.664875
								NA	0.876874	0.634058
								NA	0.840102	0.676012
								NA	0.805667	0.654603
								NA	0.826172	0.687861
								NA	0.96347	0.665425
								NA	0.970379	0.663096
								NA	0.947943	0.655185
								NA	0.909045	0.626907
								NA	0.898158	0.637598
								NA	0.884647	0.628928
								NA	0.757164	0.670437
								NA	0.734977	0.454683
								NA	0.705579	0.451045
								NA	0.716198	0.511554
								NA	0.69956	0.539944
								NA	0.701503	0.510822
								NA	0.709453	0.512097
								NA	0.660845	0.497867
								NA	0.693854	0.501779
								NA	0.622471	0.492959
								NA	0.691289	0.539611
								NA	0.709276	0.510508
								NA	0.695811	0.533859
								NA	0.86244	0.547959
								NA	0.776367	0.569388
								NA	0.76427	0.529567
								NA	0.720111	0.525504
								NA	0.763432	0.56223
								NA	0.723847	0.579091
								NA	0.802624	0.518876
								NA	0.765585	0.470851
								NA	0.686075	0.565311
								NA	0.664686	0.517744
								NA	0.840214	0.462522
								NA	0.611635	0.468574
								NA	0.773619	0.52693
								NA	0.853731	0.502741
								NA	0.76497	0.467612
								NA	0.87442	0.471754
								NA	0.862486	0.544407
								NA	0.871175	0.565135
								NA	0.788492	0.535181
								NA	0.785495	0.593839
								NA	0.691767	0.575211
								NA	0.748383	0.548385
								NA	0.683209	0.568393
								NA	0.832722	0.522462
								NA	0.75613	0.537962
								NA	0.769432	0.578685
								NA	0.718279	0.557682
								NA	0.721924	0.522056
								NA	0.679918	0.595056
								NA	1.00804	0.518267
								NA	1.04333	NA
								NA	1.00448	NA
								NA	1.01976	NA
								NA	0.97952	NA
								NA	1.00565	NA
								NA	0.977838	NA
								NA	0.713019	NA
								NA	0.872019	NA
								NA	0.951581	NA
								NA	0.997892	NA
								NA	0.926541	NA
								NA	0.973729	NA
								NA	0.908522	NA
								NA	1.03951	NA
								NA	0.994555	NA
								NA	1.05429	NA
								NA	0.970981	NA
								NA	1.02985	NA
								NA	1.01846	NA
								NA	0.829856	NA
								NA	0.691172	NA
								NA	0.691113	NA
								NA	0.832172	NA
								NA	0.860791	NA
								NA	0.66659	NA
								NA	0.944894	NA
								NA	0.946105	NA
								NA	0.964353	NA
								NA	0.873354	NA
								NA	0.771552	NA
								NA	0.820604	NA
								NA	0.816888	NA
								NA	0.803835	NA
								NA	0.804921	NA
								NA	0.675416	NA
								NA	0.737496	NA
								NA	0.685021	NA
								NA	0.878065	NA
								NA	0.932698	NA
								NA	0.796598	NA
								NA	0.946942	NA
								NA	0.871293	NA
								NA	0.696635	NA
								NA	0.839533	NA
								NA	0.796186	NA
								NA	0.82629	NA
								NA	0.870095	NA
								NA	0.615169	NA
								NA	0.857827	NA
								NA	0.947296	NA
								NA	0.907632	NA
								NA	0.837021	NA
								NA	0.927785	NA
								NA	0.755064	NA
								NA	0.970229	NA
								NA	0.847411	NA
								NA	0.834541	NA
								NA	0.815049	NA
								NA	0.763177	NA
								NA	0.847954	NA
								NA	0.732935	NA
								NA	0.828862	NA
								NA	0.812759	NA
								NA	0.821154	NA
								NA	0.832002	NA
								NA	0.810378	NA
								NA	0.907233	NA
