# Supplementary material for: Myofibril diameter is set by a finely tuned mechanism of protein oligomerization in Drosophila
Source: eLife. 2019 Nov 20;8:e50496. doi: 10.7554/eLife.50496 (PMC6910826; doi:10.7554/eLife.50496)
Supplement: Figure 5—source data 1. [file elife-50496-fig5-data1.xlsx]

## Sheet: sourceActin
Distance to center (μm)	Actin; n=23		Distance to center (μm)	Zasp52; n=25		Distance to center (μm)	Zasp66; n=17		Distance to center (μm)	Zasp67; n=10		Distance to center (μm)	Random; n=10
-0.96192	0.418533		-0.98196	0.138003		-0.83166	0.357825		-0.86172	0.523624		-0.98196	0.326469
-0.94188	0.429453		-0.96192	0.144218		-0.81162	0.374396		-0.84168	0.538572		-0.96192	0.321823
-0.92184	0.449384		-0.94188	0.16228		-0.79158	0.399281		-0.82164	0.560015		-0.94188	0.319577
-0.9018	0.476917		-0.92184	0.191946		-0.77154	0.666074		-0.8016	0.585587		-0.92184	0.327584
-0.88176	0.50979		-0.9018	0.234151		-0.7515	0.7529		-0.78156	0.612876		-0.9018	0.365042
-0.86172	0.550925		-0.88176	0.2871		-0.73146	0.791564		-0.76152	0.635382		-0.88176	0.464706
-0.84168	0.598022		-0.86172	0.348402		-0.71142	0.838206		-0.74148	0.664455		-0.86172	0.628488
-0.82164	0.644412		-0.84168	0.418354		-0.69138	0.886523		-0.72144	0.698425		-0.84168	0.819625
-0.8016	0.689683		-0.82164	0.4945		-0.67134	0.935837		-0.7014	0.748124		-0.82164	0.975776
-0.78156	0.73456		-0.8016	0.573175		-0.6513	0.977357		-0.68136	0.795079		-0.8016	1.06552
-0.76152	0.779197		-0.78156	0.649524		-0.63126	1.00837		-0.66132	0.845935		-0.78156	1.09776
-0.74148	0.822598		-0.76152	0.722331		-0.61122	1.03095		-0.64128	0.891179		-0.76152	1.09673
-0.72144	0.861871		-0.74148	0.790028		-0.59118	1.04375		-0.62124	0.935113		-0.74148	1.08768
-0.7014	0.899497		-0.72144	0.849297		-0.57114	1.05289		-0.6012	0.979259		-0.72144	1.08241
-0.68136	0.932296		-0.7014	0.898943		-0.5511	1.06044		-0.58116	1.00128		-0.7014	1.08116
-0.66132	0.959725		-0.68136	0.941839		-0.53106	1.06706		-0.56112	1.0224		-0.68136	1.07927
-0.64128	0.981709		-0.66132	0.975767		-0.51102	1.07398		-0.54108	1.05528		-0.66132	1.07583
-0.62124	1.00272		-0.64128	1.00244		-0.49098	1.07843		-0.52104	1.07031		-0.64128	1.07161
-0.6012	1.02201		-0.62124	1.02497		-0.47094	1.08105		-0.501	1.08577		-0.62124	1.0706
-0.58116	1.038		-0.6012	1.04334		-0.4509	1.08568		-0.48096	1.10327		-0.6012	1.07293
-0.56112	1.04903		-0.58116	1.05726		-0.43086	1.0942		-0.46092	1.12738		-0.58116	1.07515
-0.54108	1.05875		-0.56112	1.06986		-0.41082	1.1012		-0.44088	1.13454		-0.56112	1.07412
-0.52104	1.06746		-0.54108	1.08093		-0.39078	1.10472		-0.42084	1.14153		-0.54108	1.0717
-0.501	1.07555		-0.52104	1.09164		-0.37074	1.10924		-0.4008	1.16257		-0.52104	1.07013
-0.48096	1.08458		-0.501	1.10076		-0.3507	1.10892		-0.38076	1.17294		-0.501	1.07211
-0.46092	1.0929		-0.48096	1.10898		-0.33066	1.10593		-0.36072	1.1813		-0.48096	1.07519
-0.44088	1.10323		-0.46092	1.11589		-0.31062	1.09897		-0.34068	1.17484		-0.46092	1.07881
-0.42084	1.11281		-0.44088	1.12158		-0.29058	1.08974		-0.32064	1.17453		-0.44088	1.08081
-0.4008	1.11823		-0.42084	1.12689		-0.27054	1.08802		-0.3006	1.18149		-0.42084	1.08271
-0.38076	1.12275		-0.4008	1.13109		-0.2505	1.08504		-0.28056	1.17566		-0.4008	1.08441
-0.36072	1.12713		-0.38076	1.13694		-0.23046	1.07489		-0.26052	1.15708		-0.38076	1.08324
-0.34068	1.13056		-0.36072	1.14242		-0.21042	1.0642		-0.24048	1.14076		-0.36072	1.07958
-0.32064	1.13306		-0.34068	1.14796		-0.19038	1.05135		-0.22044	1.1312		-0.34068	1.0775
-0.3006	1.13731		-0.32064	1.15253		-0.17034	1.03679		-0.2004	1.11737		-0.32064	1.07744
-0.28056	1.14047		-0.3006	1.15902		-0.1503	1.02323		-0.18036	1.09462		-0.3006	1.07729
-0.26052	1.14328		-0.28056	1.16461		-0.13026	1.02282		-0.16032	1.06803		-0.28056	1.07628
-0.24048	1.14835		-0.26052	1.1694		-0.11022	1.02631		-0.14028	1.03865		-0.26052	1.07511
-0.22044	1.1512		-0.24048	1.17426		-0.09018	1.03015		-0.12024	1.01705		-0.24048	1.07398
-0.2004	1.15279		-0.22044	1.18071		-0.07014	1.02216		-0.1002	0.986523		-0.22044	1.07284
-0.18036	1.15985		-0.2004	1.18584		-0.0501	1.00071		-0.08016	0.983785		-0.2004	1.07302
-0.16032	1.16663		-0.18036	1.19051		-0.03006	0.972262		-0.06012	0.981857		-0.18036	1.07367
-0.14028	1.17332		-0.16032	1.19435		-0.01002	0.956457		-0.04008	0.984266		-0.16032	1.07458
-0.12024	1.17785		-0.14028	1.19778		0.01002	0.961024		-0.02004	0.992588		-0.14028	1.07462
-0.1002	1.17845		-0.12024	1.20142		0.03006	0.983401		0	1.00125		-0.12024	1.07431
-0.08016	1.16979		-0.1002	1.20591		0.0501	1.00468		0.02004	1.01371		-0.1002	1.07302
-0.06012	1.15917		-0.08016	1.21005		0.07014	1.01728		0.04008	1.00843		-0.08016	1.07224
-0.04008	1.15191		-0.06012	1.21236		0.09018	1.02177		0.06012	1.0104		-0.06012	1.07348
-0.02004	1.14876		-0.04008	1.214		0.11022	1.02541		0.08016	1.0136		-0.04008	1.07613
0	1.15248		-0.02004	1.21593		0.13026	1.04306		0.1002	1.02901		-0.02004	1.07577
0.02004	1.15211		0	1.21938		0.1503	1.05455		0.12024	1.04872		0	1.07598
0.04008	1.15534		0.02004	1.22354		0.17034	1.06372		0.14028	1.05699		0.02004	1.07408
0.06012	1.16019		0.04008	1.22534		0.19038	1.06923		0.16032	1.07402		0.04008	1.07482
0.08016	1.16566		0.06012	1.22288		0.21042	1.07726		0.18036	1.09844		0.06012	1.07507
0.1002	1.16684		0.08016	1.21494		0.23046	1.08469		0.2004	1.11968		0.08016	1.07587
0.12024	1.16439		0.1002	1.20744		0.2505	1.08774		0.22044	1.13433		0.1002	1.07615
0.14028	1.15993		0.12024	1.20478		0.27054	1.0869		0.24048	1.14855		0.12024	1.07415
0.16032	1.15421		0.14028	1.20363		0.29058	1.08977		0.26052	1.15625		0.14028	1.0739
0.18036	1.15009		0.16032	1.19979		0.31062	1.09307		0.28056	1.17259		0.16032	1.07313
0.2004	1.14912		0.18036	1.19281		0.33066	1.09953		0.3006	1.1757		0.18036	1.07357
0.22044	1.14761		0.2004	1.18664		0.3507	1.10317		0.32064	1.16844		0.2004	1.07299
0.24048	1.14669		0.22044	1.18113		0.37074	1.10226		0.34068	1.15554		0.22044	1.07383
0.26052	1.14399		0.24048	1.17471		0.39078	1.09866		0.36072	1.15145		0.24048	1.07498
0.28056	1.14053		0.26052	1.1693		0.41082	1.09309		0.38076	1.15613		0.26052	1.07578
0.3006	1.13528		0.28056	1.16377		0.43086	1.08846		0.4008	1.15867		0.28056	1.07708
0.32064	1.13173		0.3006	1.1585		0.4509	1.08501		0.42084	1.15336		0.3006	1.07839
0.34068	1.12853		0.32064	1.15368		0.47094	1.08027		0.44088	1.13899		0.32064	1.08062
0.36072	1.12501		0.34068	1.14892		0.49098	1.07483		0.46092	1.12518		0.34068	1.08144
0.38076	1.12031		0.36072	1.14389		0.51102	1.06966		0.48096	1.10753		0.36072	1.08169
0.4008	1.11572		0.38076	1.13869		0.53106	1.06119		0.501	1.08525		0.38076	1.08227
0.42084	1.10833		0.4008	1.13342		0.5511	1.05423		0.52104	1.06506		0.4008	1.08211
0.44088	1.09756		0.42084	1.12811		0.57114	1.04746		0.54108	1.05112		0.42084	1.08071
0.46092	1.08749		0.44088	1.12388		0.59118	1.03638		0.56112	1.02711		0.44088	1.0768
0.48096	1.07923		0.46092	1.11823		0.61122	1.02186		0.58116	0.99587		0.46092	1.07207
0.501	1.07156		0.48096	1.11023		0.63126	0.997127		0.6012	0.962717		0.48096	1.06941
0.52104	1.06438		0.501	1.10239		0.6513	0.963756		0.62124	0.929134		0.501	1.07066
0.54108	1.05596		0.52104	1.09542		0.67134	0.920016		0.64128	0.885711		0.52104	1.07371
0.56112	1.04386		0.54108	1.087		0.69138	0.868376		0.66132	0.841623		0.54108	1.07537
0.58116	1.02898		0.56112	1.07588		0.71142	0.817727		0.68136	0.803854		0.56112	1.07436
0.6012	1.01111		0.58116	1.06241		0.73146	0.771609		0.7014	0.763883		0.58116	1.07192
0.62124	0.99157		0.6012	1.04757		0.7515	0.729443		0.72144	0.717674		0.6012	1.0706
0.64128	0.969995		0.62124	1.03027		0.77154	0.54628		0.74148	0.675438		0.62124	1.07295
0.66132	0.94496		0.64128	1.00874		0.79158	0.379207		0.76152	0.642827		0.64128	1.07755
0.68136	0.914431		0.66132	0.982756		0.81162	0.324155		0.78156	0.611686		0.66132	1.08182
0.7014	0.879473		0.68136	0.951001		0.83166	NA		0.8016	0.582884		0.68136	1.0848
0.72144	0.84124		0.7014	0.913786					0.82164	0.557403		0.7014	1.08751
0.74148	0.8002		0.72144	0.867521					0.84168	0.53661		0.72144	1.09085
0.76152	0.756474		0.74148	0.812634					0.86172	0.518613		0.74148	1.09182
0.78156	0.711245		0.76152	0.749927								0.76152	1.07677
0.8016	0.66696		0.78156	0.679968								0.78156	1.02193
0.82164	0.619835		0.8016	0.604349								0.8016	0.904554
0.84168	0.571994		0.82164	0.52658								0.82164	0.732588
0.86172	0.528584		0.84168	0.450003								0.84168	0.551957
0.88176	0.492129		0.86172	0.377178								0.86172	0.414555
0.9018	0.461314		0.88176	0.3113								0.88176	0.341563
0.92184	0.437428		0.9018	0.254102								0.9018	0.318146
0.94188	0.4219		0.92184	0.2074								0.92184	0.319922
0.96192	0.416167		0.94188	0.172947								0.94188	0.326816
			0.96192	0.151062								0.96192	0.330465
			0.98196	0.14091								0.98196	0.331394
