# Supplementary material for: Myofibril diameter is set by a finely tuned mechanism of protein oligomerization in Drosophila
Source: eLife. 2019 Nov 20;8:e50496. doi: 10.7554/eLife.50496 (PMC6910826; doi:10.7554/eLife.50496)
Supplement: Figure 6—source data 1. [file elife-50496-fig6-data1.xlsx]

## Sheet: Sheet1
Figure 6F and G Zas52-mCherry intensity at the Z-disc in different Zasp overexpressing backgrounds;n=400							Figure 6C Z-disc diameter in Zasp52 mutants; n=1000					Figure 6D and E Z-disc diameter in different Zasp overexpresing backgrounds; n=1000							Figure 6_supplemental figure 1.actininGFP in different Zasp overexpressing backgrounds;n=100
Control	Zasp52-PP	Zasp52-PP-*143	Zasp66	Zasp67			Control	Zasp52-MIO2988/Df2RBSC427	Zasp52-MIO0979/Df2RBSC427			Control	Zasp52-PP	Zasp52-PP*143	Zasp66	Zasp67			Control	Zasp52-PP	Zasp52-PP-*143	Zasp66	Zasp67
139.897	35.53	195.599	129.638	68.184			1.622	1.402	1.223			1.281	2.002	1.602	1.782	1.902			1.11673	1.14612	0.94474	0.890169	1.04553
136.256	34.525	112.469	99.233	53.744			1.662	1.942	1.283			1.502	2.963	1.301	1.402	1.782			1.068	0.969333	0.951409	0.893065	1.02489
143.151	31.991	71.523	141.354	14.614			1.502	1.542	1.223			1.321	1.462	1.562	1.301	1.622			1.1218	0.891739	0.629935	1.0434	1.08096
136.577	26.192	137.084	162.854	55.501			2.363	1.422	2.505			1.562	2.002	2.022	1.722	1.842			1.09963	0.73936	1.00943	1.05275	0.892702
113.668	42.149	84.222	187.416	82.631			1.482	1.542	1.343			1.642	1.662	1.662	1.081	1.482			1.09123	1.02105	1.02813	0.958091	0.874435
103.895	34.162	142.144	95.055	66.088			1.722	1.021	0.942			1.702	1.662	1.081	1.862	1.722			1.08937	0.758835	0.966693	0.979555	1.02145
118.944	26.296	140.692	180.939	50.109			1.462	1.422	3.006			1.682	1.542	1.502	1.842	1.402			1.05623	1.0415	0.909831	1.07741	1.08622
138.669	34.49	93.61	145.376	42.125			1.462	1.802	1.884			1.482	1.802	1.321	1.121	1.442			1.07748	1.05929	0.73779	1.01069	0.90681
107.015	92.187	134.247	110.376	39.671			1.241	1.762	1.162			1.582	1.562	1.662	0.881	1.702			1.02489	1.02828	1.01202	0.987331	1.11611
152.491	24.327	94.837	122.044	64.75			2.703	1.542	1.924			1.602	1.742	1.722	1.221	1.502			1.07007	0.944534	1.00666	0.743821	1.05575
127.631	51.147	106.688	92.746	44.232			1.542	1.662	1.182			1.321	1.882	1.462	1.522	1.081			1.04189	1.06396	0.891382	0.917201	0.9416
120.749	90.206	103.27	89.374	46.219			1.602	1.502	1.082			1.361	1.462	1.842	1.642	1.802			1.07626	1.00402	1.02243	1.07773	0.965929
127.142	40.858	110.424	133.35	42.583			1.462	1.502	1.082			1.542	1.982	1.642	1.602	1.402			1.09394	1.01984	0.591173	1.10902	1.10236
151.055	96.692	135.263	102.852	48.873			1.041	1.201	1.323			1.662	1.842	1.642	1.341	1.041			0.950114	1.11191	0.997754	0.961275	1.06446
83.436	32.03	79.603	108.009	37.042			1.502	1.722	1.202			1.301	1.081	1.602	1.742	1.722			0.946179	0.994757	0.981376	0.988764	0.912828
86.108	27.675	95.031	194.122	69.431			1.221	1.582	1.443			1.482	2.443	1.722	1.682	3.584			0.930389	1.00436	0.904245	1.00964	1.07339
135.057	22.982	140.048	123.668	48.81			1.582	1.942	1.303			1.642	2.182	1.502	1.181	2.683			0.946379	0.886227	1.02265	1.0091	1.09776
115.711	88.921	159.536	177.116	48.41			1.341	1.622	2.084			1.562	1.502	0.581	1.802	1.802			0.845588	1.01871	0.822578	1.00076	1.05679
155.703	105.613	93.612	117.376	69.418			1.562	1.842	1.182			1.462	1.662	1.522	1.181	1.482			0.902674	1.07699	0.932729	0.907198	1.12734
108.12	21.521	116.105	99.721	34.779			1.482	1.402	1.062			2.102	2.963	1.642	1.582	1.041			1.00173	0.885946	1.02277	0.978586	0.984917
128.573	21.813	118.616	123.333	56.238			1.702	1.942	1.202			1.542	1.181	1.622	1.862	2.222			0.938591	0.988827	1.01466	1.04671	0.89528
119.918	37.674	140.022	111.314	66.033			1.201	1.542	1.202			1.422	1.422	1.662	1.822	1.442			1.08431	0.993325	0.95323	1.01565	1.02133
110.688	45.687	80.652	172.288	37.696			1.422	1.782	1.904			1.502	1.662	1.402	1.301	1.782			0.951397	0.525271	1.01298	0.887773	1.05721
151.21	76.367	140.101	110.642	35.68			1.622	1.642	1.303			1.542	1.422	1.221	1.882	1.101			1.0774	0.976171	0.924158	1.04755	1.10644
77.846	26.663	117.25	94.962	32.545			1.341	1.782	1.343			2.643	1.261	1.662	1.642	1.562			1.06071	1.0701	1.02233	1.03476	1.05183
143.024	33.726	106.197	135.039	65.893			1.402	1.762	1.463			1.382	1.622	1.502	2.082	3.264			1.08622	0.936276	0.930339	1.07738	1.11999
107.071	29.243	93.469	103.213	62.512			1.422	1.321	1.363			1.502	1.301	1.061	2.202	1.121			1.00861	0.918746	0.991123	1.01708	0.965429
133.739	46.357	132.682	85.535	43.7			1.361	1.321	1.263			2.663	1.201	1.041	1.682	1.762			0.965191	0.934712	0.923926	1.02023	1.06889
113.543	58.801	95.958	112.887	64.361			1.402	2.022	1.623			1.622	1.261	1.642	1.582	1.722			0.945172	0.985742	0.917633	0.823929	0.915906
114.474	43.52	99.357	115.677	53.488			1.622	1.642	1.483			1.301	1.522	1.422	2.242	1.442			1.03083	0.882624	0.95007	1.01524	0.892452
117.886	51.462	94.337	94.783	72.568			1.402	1.602	1.403			1.542	1.281	1.822	1.502	1.622			0.879708	1.08008	1.03017	0.741506	0.924126
133.719	41.559	111.761	88.94	34.542			1.562	1.902	1.062			1.602	1.742	1.562	1.702	1.682			0.988139	1.09556	0.811367	0.978704	0.956614
99.141	80.025	110.807	105.186	36.878			1.562	1.722	1.122			3.224	1.341	1.522	1.882	1.221			1.07854	1.02776	1.02023	0.940449	0.829716
139.902	39.847	97.034	178.869	30.536			1.502	1.862	1.363			1.562	1.402	1.382	1.562	1.422			1.06565	0.897895	0.86221	0.961475	1.0833
105.244	44.419	100.255	116.614	12.884			2.142	2.863	1.243			1.622	1.582	1.662	1.982	2.182			0.964979	1.05917	1.01042	0.970403	0.984479
122.018	39.412	91.745	94.75	41.465			1.321	2.663	1.443			2.062	1.341	1.341	1.562	1.301			0.933761	1.04388	0.871332	1.03511	0.953749
107.263	55.144	144.254	93.054	36.762			1.562	1.382	1.343			1.722	1.822	3.023	0.981	1.502			0.975689	1.02111	0.895467	1.07066	1.0501
150.039	91.567	114.073	104.508	59.292			1.402	1.402	1.423			1.802	1.942	1.622	1.141	0.821			0.896644	1.05276	0.954131	0.919028	1.04959
95.123	83.387	110.399	170.939	64.322			1.422	1.682	1.463			1.662	2.383	1.382	1.422	2.122			1.07626	1.02812	0.977316	1.00215	0.811636
114.193	46.523	112.783	113.582	64.441			1.502	3.163	1.343			1.321	1.602	1.301	1.482	1.702			0.830129	1.11858	1.0293	0.988677	1.07844
118.706	69.923	93.57	97.074	57.86			1.462	1.522	1.022			1.582	1.922	1.361	1.402	1.462			0.989809	0.914348	0.657706	0.809647	0.879708
101.792	26.406	128.73	130.065	67.484			1.281	1.602	1.824			1.301	2.162	1.341	1.782	1.642			0.999568	0.846933	0.619901	0.922093	0.895449
152.856	25.594	83.759	134.518	64.161			2.363	1.542	1.704			1.321	0.701	1.582	1.762	1.522			1.0275	1.06631	1.02359	0.583428	0.916651
131.161	53.941	103.825	111.869	58.69			1.321	3.103	2.986			1.502	1.482	1.582	2.022	0.861			1.00298	1.07335	1.0338	0.936426	0.906578
121.472	67.459	109.167	91.879	77.155			1.402	1.802	1.884			1.442	1.301	1.562	1.061	2.222			0.997166	1.00333	0.963008	0.841284	0.769283
101.831	67.179	88.423	99.863	41.643			1.482	1.161	1.403			1.622	1.041	1.402	1.602	1.582			1.10423	0.946317	0.8391	0.990397	1.05254
114.453	102.278	82.558	122.728	67.345			1.321	1.882	1.243			1.482	1.762	1.822	1.402	1.562			0.970428	0.948988	0.995915	0.96536	1.07741
135.023	72.203	136.322	165.631	47.048			2.383	1.822	1.603			1.361	2.142	1.502	1.241	1.662			1.11709	0.991629	1.00488	1.04952	1.05955
149.082	65.427	157.576	91.081	14.909			1.442	3.163	1.122			1.662	1.442	1.722	1.962	1.562			1.11536	1.05841	0.9999	0.996215	1.09559
107.419	31.659	145.587	97.697	72.196			1.361	1.742	1.503			2.943	1.942	1.742	1.662	1.902			0.811636	1.08791	1.01309	1.05996	0.998173
139.051	92.959	111.317	122.317	13.199			2.983	1.361	1.243			1.321	1.762	1.602	1.522	1.121			0.927148	1.07036	1.03142	0.51834	1.15703
147.95	62.617	83.977	98.937	43.736			1.582	1.442	0.942			1.402	1.221	1.562	1.962	1.922			1.04427	1.01978	0.459389	1.01954	0.805117
129.86	52.275	165.101	77.815	38.6			1.402	1.742	1.463			1.622	1.562	0.641	1.942	1.582			0.888836	0.91884	0.94982	0.993788	1.05357
88.108	81.605	110.869	120.15	45.867			1.522	1.602	1.323			1.482	1.462	1.422	1.942	1.702			1.03607	1.03476	0.95241	0.841115	0.89787
144.456	37.357	121.947	103.061	37.07			2.142	1.402	1.383			1.442	1.722	1.562	1.762	1.321			1.0878	0.783884	1.00986	1.1191	1.12613
78.808	34.409	114.955	180.032	69.798			1.402	1.982	1.062			1.562	2.323	1.642	1.642	1.722			1.01453	0.815703	1.0469	1.01853	1.01912
98.287	20.996	123.133	165.373	54.94			1.382	1.782	1.423			1.281	1.942	1.542	1.542	1.482			1.02898	0.908874	0.964247	1.02096	1.00021
148.139	64.236	142.856	107.541	66.205			2.843	1.562	1.182			1.442	1.622	1.782	1.261	1.842			1.12613	0.923069	0.891858	0.886815	0.901536
140.791	68.69	130.403	116.26	34.191			1.382	3.884	0.701			1.582	1.382	2.663	1.462	1.261			0.917839	1.01134	1.01898	1.02542	1.05697
99.075	88.855	182.67	99.225	36.847			1.542	5.646	1.383			1.602	1.642	1.702	1.402	2.062			1.10607	1.01745	0.908217	1.05473	1.07298
128.506	106.65	98.268	86.819	54.542			1.462	1.662	1.363			1.762	3.023	1.682	1.442	1.462			1.07903	0.936101	0.937446	1.02634	1.02125
117.012	61.24	94.084	107.068	35.506			1.482	1.321	0.942			1.482	2.222	1.562	1.522	1.522			1.06656	1.07026	1.00389	0.939429	1.06419
130.613	29.921	135.997	185.69	50.933			1.382	1.882	1.523			1.562	2.002	1.422	1.902	0.781			0.769283	1.02357	0.787732	0.995833	1.11471
87.802	107.983	143.441	121.667	73.12			1.502	3.244	1.784			1.582	1.301	1.802	0.961	1.842			0.9416	1.15058	0.997516	0.972573	1.0266
131.702	41.07	89.999	159.853	62.556			1.201	1.862	1.423			1.662	1.361	1.762	1.602	1.842			1.03222	1.07869	0.974275	1.01545	1.06909
110.539	37.021	141.922	71.409	42.824			1.602	1.662	1.343			2.503	2.503	1.582	1.902	1.542			1.0621	0.946029	0.556683	0.897319	0.849392
123.648	23.091	142.501	124.284	60.946			1.542	1.121	1.243			1.682	1.261	1.482	1.582	1.902			0.751853	1.03895	1.00325	0.596809	1.00844
138.81	37.881	130.658	113.075	46.049			1.382	1.241	1.623			1.622	1.442	1.662	1.221	1.642			1.00875	1.01565	0.997735	0.998023	1.11066
138.64	50.729	88.516	186.331	68.52			1.442	1.361	0.721			2.443	1.602	1.682	1.682	0.961			1.0771	1.02201	1.01285	1.08945	0.828822
149.585	42.053	113.323	86.926	37.36			1.462	1.762	2.225			1.662	1.502	1.682	1.642	1.622			0.727154	1.0316	1.02064	0.997141	0.999525
137.201	101.442	93.025	100.849	43.704			1.301	1.922	1.182			2.142	2.182	1.522	1.682	1.562			0.773255	0.925165	1.02482	1.02489	1.0491
133.375	48.77	160.974	80.486	69.851			1.542	1.962	0.962			1.442	1.982	1.502	1.742	1.341			0.885014	1.00341	0.951822	1.00881	0.900091
111.952	56.401	77.62	185.196	38.274			1.462	1.742	1.303			1.522	1.261	1.542	1.902	1.722			0.984479	1.06157	0.965029	0.979593	1.07218
142.059	55.398	136.773	156.566	73.292			1.522	1.642	1.122			2.443	1.602	1.542	1.702	0.861			1.12064	0.89904	0.986862	1.03991	0.97054
151.889	78.063	101.68	179.483	48.968			2.523	1.602	1.243			1.301	1.261	1.682	1.622	1.862			0.819144	0.90873	1.00277	1.07886	1.10346
125.519	24.943	76.743	132.358	61.157			1.542	2.743	1.423			1.422	1.922	1.662	1.922	1.682			1.0192	0.943558	1.0128	0.966737	0.819144
119.03	40.096	129.799	105.095	13.455			1.542	1.942	1.283			1.602	1.141	1.822	1.742	1.802			1.08825	1.07778	0.808439	0.883412	0.776859
134.237	57.053	114.46	200.981	69.105			1.341	1.321	1.323			1.422	1.522	1.402	1.201	1.922			1.10678	0.924039	0.95866	1.08771	1.03034
139.241	81.739	100.118	88.858	67.23			1.482	1.642	1.483			1.341	1.301	1.602	0.841	0.881			1.02133	0.853877	0.983659	1.01958	1.07402
132.276	24.155	109.376	189.292	61.592			1.602	0.861	1.483			1.562	2.663	1.622	1.842	1.722			0.911176	1.14856	0.921812	0.987344	0.942325
154.036	52.84	63.908	115.872	75.485			1.522	1.482	1.303			1.462	1.341	1.762	1.802	1.522			0.836736	1.02555	0.959974	1.01782	1.02186
143.014	26.019	137.844	90.914	59.625			1.301	1.682	1.202			1.522	2.222	1.281	1.882	1.822			1.07194	1.1441	0.676443	0.968313	1.02223
142.579	81.829	131.853	117.56	45.194			1.562	1.622	1.142			1.522	1.782	1.542	1.922	1.442			1.06051	0.87979	0.809378	0.892396	1.06463
143.86	53.625	115.443	94.347	44.548			1.622	1.682	1.724			1.822	1.802	1.422	2.122	1.842			1.11758	0.88176	0.935406	1.00875	0.911176
138.035	65.781	116.366	194.696	41.707			2.483	1.482	1.463			1.482	0.941	1.662	1.482	2.763			0.960243	0.910657	0.981882	1.03633	1.03582
140.851	49.602	90.937	196.757	75.322			2.503	1.462	1.443			1.602	1.422	1.622	1.642	2.843			0.939354	1.02711	1.06819	0.896587	1.04227
91.26	88.967	74.759	88.491	40.569			1.482	1.782	1.423			1.542	1.502	1.622	1.802	2.102			1.05183	1.03622	0.977597	0.913554	0.793869
135.467	54.168	117.597	116.694	64.929			1.422	1.922	1.463			1.602	1.742	1.542	1.682	1.061			1.07873	1.09584	1.03096	1.00457	1.05467
132.357	43.304	98.617	101.666	60.225			1.462	1.522	1.042			1.602	1.562	1.762	1.562	1.382			1.01777	0.997598	1.03348	0.913773	1.08431
152.744	78.305	144.514	87.439	35.188			1.341	1.822	1.924			1.702	0.701	1.442	2.002	2.082			0.867103	1.04894	1.00455	0.866314	1.0878
158.77	62.079	88.738	105.794	30.418			1.482	1.522	1.403			1.482	1.402	1.442	1.041	1.902			1.0722	0.841628	1.0159	1.04969	0.88238
147.268	21.997	131.806	114.181	44.813			1.482	1.742	1.503			1.261	3.224	1.702	1.862	1.982			1.07109	0.961369	0.945935	0.95251	1.02582
121.368	21.738	146.283	123.312	33.998			1.462	1.482	1.864			1.462	1.402	1.662	1.962	1.542			1.08211	1.0412	0.450274	1.06534	0.896644
101.361	34.364	88.157	98.852	13.913			1.382	1.341	1.543			1.842	2.363	1.542	1.622	1.522			0.956614	1.02631	0.996109	1.01179	0.97888
90.036	32.654	93.083	188.305	14.091			1.622	1.261	1.182			1.742	1.582	1.602	1.081	1.922			1.04227	0.991229	0.94673	0.968338	1.10199
89.955	50.905	88.121	111.761	48.935			1.402	3.204	1.323			1.682	1.702	1.762	1.862	1.522			0.916651	1.0238	1.02268	1.0432	0.991442
77.897	48.96	102.961	83.016	46.213			2.142	1.642	2.385			1.402	1.502	1.762	1.962	2.102			1.02145	1.05719	0.900466	1.00769	1.09366
102.965	22.754	91.611	82.372	15.458			1.482	2.022	1.423			1.482	2.823	1.522	1.141	1.762			0.949432	0.996578	0.961344	0.891032	0.902674
101.159	28.058	85.171	102.932	43.104			1.722	1.482	2.505			1.482	3.464	1.281	2.222	1.762			0.828822	1.00891	1.03871	1.05151	1.07445
88.405	31.874	110.397	122.366	42.351			1.281	1.902	1.503			1.522	2.303	1.762	1.542	2.303			1.11066	0.967644	0.898145	0.539466	0.832619
125.013	80.117	88.816	140.006	60.234			2.883	1.361	1.323			2.122	1.021	1.181	1.762	1.482
155.357	35.051	161.257	152.963	59.182			1.382	1.502	1.583			1.782	3.003	1.642	1.882	1.642
89.05	51.298	97.902	112.134	42.679			1.402	4.205	1.704			1.542	1.321	1.602	2.062	2.062
143.206	38.305	80.288	95.772	34.825			1.762	1.582	1.503			1.462	1.742	2.943	2.383	1.962
150.565	46.066	106.295	96.062	40.79			1.522	1.962	2.746			1.762	1.261	1.902	1.061	1.121
136.566	32.975	147.231	110.927	45.205			1.482	1.802	1.724			1.462	0.641	1.642	1.862	1.402
147.674	37.946	158.773	78.636	49.225			1.402	1.662	1.202			1.482	2.162	1.041	1.522	1.562
116.195	30.144	100.317	88.621	39.821			1.622	1.502	1.323			1.502	1.502	1.622	1.702	1.562
114.626	67.101	147.115	80.367	67.627			1.822	1.742	1.283			1.482	1.382	1.101	1.301	1.642
117.112	63.312	66.445	137.665	74.875			1.402	1.341	1.463			1.482	2.343	1.402	1.261	1.462
115.997	75.419	153.461	168.115	30.419			1.682	1.622	2.826			1.402	1.201	1.442	1.942	0.961
127.332	61.59	118.064	101.11	12.879			1.341	1.662	1.403			1.682	1.642	1.682	1.822	1.662
144.324	105.863	140.751	152.646	51.027			1.482	1.542	1.243			1.361	2.082	1.562	0.961	2.763
148.917	118.21	105.362	111.579	70.458			1.382	1.522	1.202			1.462	1.542	1.682	1.842	1.762
132.107	32.624	145.113	92.799	52.661			1.742	2.002	1.162			2.863	1.402	1.822	1.462	1.482
106.299	30.055	135.425	123.779	47.072			1.542	1.402	1.202			1.642	1.742	1.642	1.802	1.922
120.823	32.136	140.684	146.88	60.862			1.522	1.422	1.423			1.682	1.341	1.522	2.222	1.862
87.921	51.927	105.416	185.957	60.669			1.442	1.742	1.443			1.402	1.382	1.382	1.662	1.442
113.813	47.575	127.851	91.81	40.239			1.582	1.562	1.323			2.723	1.361	1.522	1.882	1.902
136.678	26.657	102.195	103.397	16.043			1.602	1.301	1.343			1.321	1.622	1.762	1.882	0.801
84.167	99.145	91.082	107.74	65.651			1.402	1.261	1.042			1.402	1.462	1.582	1.522	1.121
134.722	100.887	91.068	129.547	46.747			1.341	1.662	0.942			1.402	3.023	1.722	1.301	3.444
149.11	58.979	95.955	97.654	37.769			1.902	1.782	1.263			1.622	3.464	1.402	1.442	1.622
150.15	36.147	77.259	118.199	60.358			1.462	1.562	1.423			1.522	1.582	1.582	1.181	1.962
142.103	102.892	100.057	106.951	14.561			1.382	1.842	0.982			1.582	1.402	1.602	1.582	1.582
136.698	121.914	115.507	113.784	13.101			1.562	1.341	1.323			1.482	1.502	1.341	1.882	1.221
140.155	56.431	104.958	189.145	36.484			2.663	1.141	1.744			1.502	1.341	1.742	2.182	1.842
146.898	57.118	80.978	97.101	72.722			1.502	1.642	1.363			1.502	1.662	1.462	1.762	1.422
125.506	62.154	78.112	112.226	14.3			1.582	1.722	0.922			1.462	1.121	1.782	1.742	1.382
132.798	34.937	91.067	118.334	63.44			1.402	2.242	0.942			1.281	1.642	1.742	1.522	1.782
95.672	68.266	103.37	191.832	15.018			1.482	1.762	1.142			1.422	1.962	1.662	1.902	2.022
132.96	41.747	135.085	87.636	66.017			1.402	1.702	1.283			1.382	1.422	1.902	1.902	1.762
144.19	108.349	146.307	126.893	66.526			1.542	1.261	1.583			1.542	4.265	1.722	1.682	1.842
124.604	54.142	106.17	146.857	104.261			1.482	1.261	1.423			1.382	0.541	1.742	1.662	1.722
87.392	66.023	150.994	102.403	33.108			1.562	1.201	1.443			1.702	3.003	1.702	1.862	1.602
77.385	118.411	136.256	98.613	38.782			1.542	1.522	1.483			1.462	1.402	1.562	1.662	1.041
67.942	93.288	130.848	121.217	41.637			2.723	1.382	1.363			1.321	1.361	1.762	1.742	1.622
119.403	22.68	138.802	187.222	36.786			1.462	1.281	1.162			1.442	1.742	1.341	2.002	1.462
104.129	102.576	131.819	80.27	53.359			1.382	1.742	1.443			1.422	1.802	1.502	1.642	1.402
109.685	34.135	87.655	177.676	14.127			1.041	1.722	1.483			1.442	1.422	1.442	0.981	1.502
113.398	115.132	147.475	100.722	47.281			1.422	1.882	1.243			1.341	2.343	1.321	1.722	2.222
138.765	70.143	143.984	129.053	54.968			1.001	1.181	1.423			1.462	1.442	1.782	2.002	1.562
150.11	25.292	68.17	140.455	59.423			1.642	1.622	1.283			1.702	1.682	1.742	1.482	1.542
119.704	114.195	145.542	97.347	39.761			2.623	1.482	1.543			1.482	1.602	1.522	1.862	1.622
93.55	24.944	92.289	123.405	67.185			1.382	1.562	0.982			1.422	1.382	1.482	1.522	1.842
121.664	59.374	104.711	118.095	64.916			1.482	1.862	0.982			1.462	1.041	1.642	1.582	0.881
119.318	114.287	132.123	99.891	63.472			1.542	1.442	1.884			0.761	2.503	1.562	1.742	2.122
130.205	51.287	124.095	121.126	64.801			1.462	1.442	1.463			1.442	1.462	3.924	1.301	1.341
136.605	104.719	86.614	115.514	35.738			1.702	1.622	1.002			1.422	1.442	1.402	1.802	1.702
133.907	22.59	77.557	197.625	77.4			1.522	1.562	1.303			1.502	2.002	1.702	1.802	1.682
117.154	99.693	92.871	151.917	67.414			1.402	2.022	1.784			1.602	1.502	1.522	1.982	1.422
148.921	96.01	99.244	107.719	57.9			1.502	1.241	1.343			1.542	1.502	1.422	1.642	1.261
135.827	37.404	119.272	105.139	36.51			1.402	2.182	1.303			1.702	1.301	1.542	1.402	1.361
142.497	48.838	100.526	184.832	59.687			1.422	1.682	2.285			1.522	2.242	1.582	1.502	1.422
118.212	29.866	120.063	114.683	55.156			1.041	1.742	1.263			1.622	1.081	1.562	1.702	1.762
164.466	37.799	109.358	134.74	42.949			1.482	1.321	1.423			1.402	1.822	1.782	1.642	1.402
102.976	74.392	121.872	120.533	65.833			2.082	1.762	1.423			1.261	1.662	1.542	1.862	1.822
147.699	54.754	140.991	153.263	61.083			1.602	1.462	1.463			1.462	1.662	1.602	1.482	4.004
116.535	33.405	116.967	141.317	39.323			1.582	1.622	1.042			1.622	1.281	1.522	1.722	1.662
148.546	53.784	99.304	137.438	61.915			1.402	1.862	1.223			1.281	2.162	1.321	1.522	1.582
139.696	58.032	84.549	127.759	13.182			1.161	1.001	1.303			1.321	1.602	1.081	1.462	1.982
138.264	104.977	149.519	137.11	42			1.341	1.522	1.323			1.642	1.922	1.662	1.742	1.321
112.252	40.081	78.803	100.825	61.117			1.742	1.742	1.323			1.482	1.802	1.762	1.321	1.121
91.582	57.673	129.023	96.006	74.629			1.502	1.382	1.443			1.462	3.224	1.682	0.841	1.021
134.486	57.852	93.136	86.398	39.232			1.402	1.502	1.363			1.782	1.422	1.161	1.542	1.382
121.755	38.643	112.839	94.039	49.636			2.363	1.662	1.002			1.502	1.402	1.422	1.522	1.982
93.679	30.637	133.779	123.696	65.185			1.281	1.181	1.263			3.404	1.422	1.662	1.722	1.662
116.934	118.009	111.989	97.472	64.909			1.462	1.782	1.283			1.562	1.321	1.702	1.542	1.622
152.279	28.632	75.429	185.221	36.795			1.462	1.181	1.002			1.602	1.462	1.542	1.862	1.442
125.3	43.012	149.13	134.889	59.36			1.562	1.281	1.202			1.542	1.682	1.442	1.221	1.682
124.41	36.519	87.662	114.349	63.391			1.301	1.642	1.463			1.582	0.861	1.602	1.602	3.204
139.834	75.413	89.276	119.376	32.998			1.382	1.702	1.343			1.642	1.081	1.842	1.862	1.321
116.078	60.984	93.496	112.656	60.578			2.543	1.862	1.062			1.542	1.882	1.101	1.321	1.502
139.353	27.703	135.057	110.855	38.345			1.221	1.902	1.223			1.622	1.522	1.361	1.662	1.882
168.915	47.261	75.137	106.259	36.434			1.602	1.121	1.263			1.602	2.242	1.402	1.782	1.562
99.963	112.313	86.029	96.152	59.682			1.902	1.321	1.142			1.301	1.702	1.762	1.562	3.103
158.666	107.423	148.27	115.361	41.011			1.261	1.682	1.283			1.602	1.301	1.542	1.862	1.722
119.278	73.054	82.369	101.953	57.595			1.462	1.642	1.643			1.582	1.742	1.522	1.962	1.882
128.089	30.094	93.883	106.452	17.432			1.482	1.682	1.603			2.283	1.141	1.562	1.662	1.402
104.135	44.737	91.669	99.744	33.813			1.582	1.422	1.764			2.062	1.562	1.642	1.802	1.101
130.972	61.699	75.93	187.199	51.212			1.582	1.442	1.383			0.841	1.001	1.622	1.482	1.822
114.875	40.004	107.461	89.821	32.7			1.081	1.522	1.483			0.841	1.962	1.682	1.882	1.842
137.748	69.91	78.589	114.722	39.502			1.321	2.923	1.343			1.241	1.742	1.041	1.341	1.642
128.548	31.606	87.597	124.961	56.806			2.523	1.662	1.223			1.582	1.161	1.341	1.962	1.261
134.319	42.853	85.431	146.003	53.988			1.382	1.802	1.002			1.862	1.181	1.301	1.782	1.642
119.752	42.692	112.64	110.58	55.581			1.662	1.482	1.202			1.442	1.462	1.502	1.702	1.962
95.03	49.528	125.379	205.346	69.097			1.502	1.702	2.064			1.982	0.841	1.762	1.782	1.662
110.56	58.478	121.329	110.291	46.993			1.361	1.021	1.423			1.542	1.281	1.622	1.882	1.121
146.305	54.151	82.134	181.011	37.508			1.502	1.802	1.423			1.722	1.221	1.562	1.321	1.101
106.861	21.103	94.479	110.479	49.67			1.382	2.303	1.483			1.502	1.802	1.762	1.281	1.462
137.491	64.863	134.625	146.917	30.545			2.403	1.742	1.543			1.562	1.642	1.041	1.662	1.822
140.847	24.94	71.275	79.585	29.209			1.462	2.343	1.182			1.542	1.041	1.562	1.642	1.241
161.712	116.64	118.938	101.171	41.37			2.663	1.802	1.243			1.582	1.301	1.442	1.321	1.762
114.005	65.554	116.575	96.943	40.378			1.402	1.622	0.962			1.442	0.941	1.562	1.682	1.642
129.708	27.671	139.327	118.121	42.562			1.562	1.542	1.443			2.863	1.001	1.522	1.662	1.922
102.236	63.251	100.885	108.524	62.303			1.582	1.542	1.363			1.482	1.422	1.762	1.462	1.982
126.085	40.016	101.884	162.975	48.637			1.422	1.902	1.363			1.582	0.741	1.522	1.402	1.702
124.843	26.679	148.079	189.262	47.76			1.502	1.562	1.303			1.482	1.442	1.742	0.841	1.762
147.73	78.897	93.619	93.352	31.879			1.482	1.802	1.764			1.542	1.281	1.361	1.462	1.281
131.723	28.324	71.474	151.072	41.977			1.462	1.662	1.363			1.502	1.882	1.582	1.682	2.303
93.469	37.655	102.448	189.661	39.56			1.462	1.502	0.962			1.462	1.402	1.462	2.082	2.022
102.918	63.367	105.651	141.062	68.81			2.463	2.663	1.884			1.402	1.301	1.682	2.222	1.922
121.738	38.379	103.947	98.677	43.331			1.462	1.862	1.042			1.762	1.622	1.642	1.101	1.281
136.67	28.167	104.77	95.112	35.775			1.361	1.562	1.503			1.602	1.442	1.442	1.922	1.101
145.855	27.98	83.452	89.227	75.584			1.482	1.522	0.862			1.462	2.082	1.562	1.522	1.922
150.67	32.97	99.001	87.133	46.746			1.542	1.642	1.223			1.442	1.542	1.301	1.482	2.303
152.507	24.913	140.976	74.715	38.953			1.562	1.822	1.202			1.482	1.201	1.341	2.002	2.343
130.415	84.91	120.014	177.771	30.33			1.482	1.061	2.024			1.422	1.321	1.482	1.462	1.822
109.331	68.258	83.073	167.511	35.674			1.582	1.462	1.363			1.682	1.502	0.721	1.562	0.961
114.684	53.516	95.368	138.065	52.324			1.361	1.642	0.822			1.502	1.622	1.822	1.742	1.382
83.609	95.91	179.476	204.121	47.888			1.341	2.022	1.383			1.502	1.782	1.522	1.021	1.882
149.869	39.99	138.348	111.735	49.544			1.442	1.602	1.904			1.662	1.682	1.602	1.442	1.922
81.175	34.486	129.335	142.715	63.317			1.462	1.662	1.403			1.402	1.542	1.602	1.882	1.582
152.161	96.619	77.07	100.06	43			1.402	1.582	2.024			1.422	0.661	1.602	1.782	1.261
117.238	21.141	148.594	106.752	66.053			1.462	1.462	1.202			1.462	1.922	1.802	2.142	0.601
108.867	69.274	96.225	99.331	49.186			1.361	1.782	1.303			1.522	1.842	1.502	1.141	1.662
154.686	65.821	85.543	85.45	14.161			1.422	1.642	1.944			1.602	0.601	1.542	1.482	2.683
146.103	96.099	98.963	133.938	41.401			1.582	1.882	1.042			1.502	1.462	1.662	1.061	1.602
157.24	83.726	124.82	95.785	58.385			1.462	1.502	1.102			1.542	1.742	1.902	1.762	1.522
115.198	94.912	93.939	192.458	15.546			1.602	1.702	1.503			1.502	1.762	1.762	1.261	1.261
111.903	44.315	144.63	116.495	14.433			1.462	1.001	1.162			1.562	1.942	1.482	1.842	1.922
131.459	33.543	95.012	138.276	39.19			1.462	1.602	1.523			1.522	0.881	1.442	1.281	1.642
128.284	108.65	140.8	93.381	54.854			1.522	1.902	1.704			2.703	1.081	1.682	2.423	1.522
118.625	48.503	113.567	117.776	72.277			1.442	1.361	1.022			1.542	2.323	1.382	1.662	1.982
118.914	74.558	140.852	109.222	42.821			1.301	1.642	1.343			1.321	2.182	2.162	1.742	1.842
119.559	30.902	105.184	104.317	58.391			1.361	1.882	1.283			1.562	1.742	2.663	1.802	1.762
137.554	30.56	71.903	101.618	39.62			1.482	0.981	1.343			1.722	1.882	1.081	2.042	1.762
110.577	36.989	135.931	140.868	34.061			1.482	1.341	3.247			1.402	1.442	2.943	1.562	1.121
146.356	25.542	103.666	123.509	42.27			1.422	1.702	2.164			1.542	1.181	1.722	1.522	1.682
162.87	34.587	103.625	126.351	50.439			2.623	1.682	1.423			1.502	2.162	1.622	1.402	1.642
153.68	65.721	88.488	86.926	57.468			2.703	1.742	1.162			2.002	1.622	1.642	1.782	1.722
123.262	91.378	144.313	132.397	50.117			1.281	1.642	1.523			1.361	1.782	1.682	1.782	1.902
164.903	77.076	93.165	84.25	37.576			1.482	1.361	1.683			1.462	1.782	1.542	1.862	1.962
109.234	51.876	102.991	92.044	58.361			1.502	1.722	1.062			2.122	1.502	1.482	1.321	1.722
62.222	35.628	111.93	134.077	36.379			1.642	1.622	1.223			1.722	0.841	1.722	1.562	1.402
125.212	44.756	100.254	136.131	65.817			1.462	1.542	2.986			1.341	1.742	1.482	1.582	1.281
146.83	27.657	129.402	85.363	66.789			1.442	1.862	1.062			1.562	0.541	1.061	1.361	1.281
124.72	113.641	71.953	111.415	52.773			1.502	1.722	1.543			1.502	1.602	1.542	1.482	1.622
146.244	43.729	97.891	101.46	77.122			1.582	1.742	1.142			2.283	1.382	1.542	1.842	1.822
105.42	103.304	95.523	107.576	58.096			1.602	1.942	1.423			1.702	1.982	1.402	1.802	2.723
115.343	44.452	135.628	144.374	59.176			1.462	2.403	1.202			1.542	1.982	1.402	1.622	1.141
135.257	27.802	89.757	123.181	13.459			1.522	1.762	1.563			1.602	1.982	1.602	1.221	1.862
134.024	39.924	96.055	89.578	61.507			1.462	1.982	2.285			1.722	1.442	1.522	1.842	1.662
99.218	63.234	75.165	84.345	60.91			1.542	1.361	1.283			1.442	1.802	1.482	1.201	3.204
98.179	64.45	128.572	114.619	38.913			1.382	1.722	1.343			1.462	1.562	1.422	1.522	1.782
134.626	48.186	87.38	116.587	31.964			1.482	1.842	1.603			2.222	2.363	1.582	2.242	1.582
143.135	29.405	98.994	90.931	71.664			1.582	1.702	1.042			1.502	3.404	1.822	1.802	1.622
153.173	101.099	132.625	109.945	61.195			1.522	1.261	1.202			2.763	1.161	1.662	1.622	1.462
68.092	93.325	102.721	149.667	15.974			1.482	1.682	1.343			1.622	2.763	1.582	1.582	1.702
146.164	37.863	117.023	110.046	45.442			1.101	1.341	1.042			1.542	4.265	1.702	1.101	1.742
140.717	65.252	99.86	101.378	14.328			1.702	2.683	1.483			1.862	2.202	1.802	1.962	1.682
157.86	38.586	78.218	150.394	70.697			1.502	1.862	2.225			1.382	1.422	1.802	1.061	1.882
126.847	73.068	138.234	103.216	50.469			1.382	1.281	0.902			1.682	1.582	1.802	1.702	2.303
115.882	35.496	90.966	179.878	55.194			1.602	0.981	1.543			2.483	1.642	1.301	1.842	1.101
135.768	30.415	90.907	90.154	69.219			1.582	1.702	0.962			1.442	1.442	1.622	1.301	2.122
118.13	64.756	112.561	124.612	17.71			1.402	1.281	1.503			1.622	1.882	0.641	1.782	1.702
117.195	28.064	72.238	111.088	43.019			1.502	1.261	1.182			1.642	1.902	1.502	1.782	1.622
136.597	27.279	106.717	92.603	38.7			2.523	1.722	1.623			1.742	1.682	1.742	1.882	2.383
103.04	36.068	136.1	99.48	59.804			1.402	1.882	2.325			1.682	1.402	1.562	1.782	1.201
114.829	52.758	99.25	115.69	45.859			1.562	1.301	1.303			1.662	1.782	1.562	1.782	1.802
132.508	37.968	149.458	200.244	14.689			1.662	1.762	1.563			1.502	1.722	1.762	1.882	0.801
106.274	57.794	118.794	109.459	69.44			1.361	1.662	0.962			1.702	1.922	1.402	1.422	0.581
124.203	112.07	121.568	110.764	57.653			1.442	1.482	1.403			1.622	1.382	1.562	1.642	1.522
124.178	54.34	97.538	128.668	78.047			1.402	1.722	1.383			1.382	1.722	0.641	1.562	1.121
125.227	39.124	106.718	184.291	44.991			1.482	1.802	1.403			1.582	1.622	1.462	2.783	1.862
145.748	64.537	125.101	91.253	14.877			1.762	1.862	0.942			1.402	1.602	1.582	1.462	2.022
109.933	44.127	107.526	157.088	42.55			1.562	1.862	0.942			1.542	1.762	1.321	1.482	1.221
148.592	77.68	108.072	172.016	69.708			2.383	2.603	1.463			1.762	0.621	1.382	1.862	2.042
138.607	44.915	131.395	140.825	65.881			1.382	1.642	2.345			1.482	1.442	1.341	1.602	2.403
122.019	79.236	136.487	116.744	53.498			1.582	1.542	0.962			1.482	1.782	1.802	1.201	2.022
131.042	39.906	90.854	175.38	57.037			1.562	1.482	1.343			1.842	1.422	1.402	1.181	1.402
118.656	53.554	98.116	186.354	16.187			1.622	1.542	1.423			1.762	1.702	1.542	1.402	1.602
130.958	92.312	126.649	178.8	55.011			1.442	1.802	1.463			1.842	1.361	1.622	1.642	1.422
88.879	33.676	70.261	91.054	36.34			1.482	1.682	1.162			1.622	1.462	1.382	1.522	1.982
143.933	42.225	93.754	95.816	62.695			1.582	1.502	1.122			1.622	1.442	1.662	2.122	1.902
117.142	31.369	105.566	183.81	58.026			1.502	1.582	1.724			1.482	2.783	1.702	1.341	1.422
118.088	20.759	114.057	86.244	56.605			1.522	1.462	1.904			1.622	0.701	1.582	1.842	1.722
124.518	46.302	89.268	102.278	63.93			1.582	1.702	1.463			1.662	1.301	1.522	1.221	3.143
95.326	35.146	99.343	143.799	46.302			1.382	1.301	1.182			1.341	1.161	1.281	1.862	1.722
146.512	28.356	138.722	100.805	46.073			2.843	1.642	1.263			1.662	1.702	1.382	0.841	1.402
108.371	76.981	78.209	108.405	51.846			1.602	1.482	1.503			1.462	2.463	1.722	1.662	2.343
149.809	50.121	89.152	107.86	59.884			1.502	1.141	1.223			1.462	1.542	1.742	1.361	2.122
127.218	85.67	98.232	95.888	44.506			1.582	1.422	1.623			2.983	1.161	1.702	1.422	2.042
126.712	57.754	94.933	146.883	63.965			2.523	2.242	1.082			1.281	1.742	1.562	1.582	1.762
146.477	46.788	90.701	112.546	48.534			1.041	1.962	1.563			1.562	3.544	1.582	1.642	1.221
153.553	98.501	137.841	96.884	55.484			1.582	1.061	1.443			1.662	1.422	1.101	1.782	1.522
115.143	54.64	92.846	111.222	77.959			1.482	1.862	1.443			1.361	1.462	1.442	1.682	1.662
146.417	70.01	134.32	124.175	38.661			1.422	2.743	1.142			1.341	2.002	1.542	1.862	1.822
119.678	27.162	77.427	178.012	60.553			1.281	3.204	1.283			1.762	1.942	1.341	1.462	1.422
62.972	74.351	114.032	122.178	37.056			2.663	1.522	1.303			1.281	2.222	1.662	1.622	0.621
137.747	39.711	76.128	112.721	63.797			1.562	1.702	2.405			1.442	1.021	1.642	1.582	1.922
119.016	90.783	137.401	114.484	67.31			1.462	1.422	1.263			1.802	1.902	1.442	1.722	1.922
148.887	39.842	82.766	104.046	12.639			1.682	1.842	1.443			1.562	1.241	1.522	1.021	1.462
100.384	69.649	85.978	95.601	32.716			1.702	1.522	2.485			1.602	1.842	1.522	2.182	3.564
115.609	45.906	112.617	102.804	34.68			1.582	2.603	1.142			1.482	3.224	2.182	1.682	0.921
131.383	51.864	122.397	95.156	59.146			1.542	1.862	1.343			1.442	1.562	1.121	1.982	1.962
145.448	52.53	131.822	168.262	15.161			1.602	1.622	4.329			1.542	1.602	1.662	1.702	1.742
141.098	49.343	155.427	129.502	13.414			1.482	1.642	1.283			2.303	1.982	1.662	1.482	1.662
117.485	67.663	82.11	96.45	51.766			1.422	1.662	1.283			2.463	1.402	1.422	1.181	1.842
148.784	35.092	99.624	101.239	60.026			1.542	1.722	1.223			1.321	1.341	1.241	2.062	1.702
147.111	58.185	74.423	131.352	69.046			1.522	1.922	1.583			1.662	1.161	1.402	1.862	1.361
122.015	49.924	116.755	139.428	65.228			1.422	1.802	1.303			1.562	1.522	1.682	1.682	2.102
130.794	72.494	137.903	96.901	34.74			2.943	1.321	1.323			1.442	1.081	1.241	1.642	1.241
72.208	36.543	159.713	179.205	15.571			1.321	1.542	1.463			1.722	1.742	1.482	1.602	2.002
141.737	30.795	119.208	181.723	36.347			1.462	1.662	3.948			1.682	2.383	1.422	1.522	1.702
124.031	39.863	116.836	165.368	31.895			1.422	1.742	1.423			1.562	1.702	1.281	1.622	1.021
153.056	86.985	117.6	122.324	59.472			2.843	1.962	1.223			1.502	1.021	1.562	0.981	1.642
118.434	94.027	77.812	197.755	16.334			1.522	1.722	1.263			1.542	2.463	1.542	1.582	1.422
75.68	39.928	71.202	118.211	45.256			1.321	1.642	1.363			1.442	1.522	1.602	1.502	2.002
137.823	38.414	118.934	118.037	30.794			1.382	1.962	3.407			1.602	1.582	1.061	1.522	1.922
106.589	50.666	105.768	127.337	29.564			1.081	1.442	1.563			1.522	1.462	1.161	1.281	1.502
114.102	69.811	76.266	131.046	46.988			1.462	1.101	1.283			1.522	1.181	0.941	1.822	1.562
119.739	47.288	154.629	133.631	52.451			1.321	1.622	1.202			1.502	1.261	1.341	1.602	1.582
112.602	51.348	91.197	154.823	62.893			1.762	2.923	1.543			1.702	1.662	1.902	1.321	0.801
89.528	36.574	113.592	104.062	32.093			1.482	1.842	1.343			1.742	1.482	1.522	1.462	1.101
73.672	27.054	126.084	105.258	52.003			1.662	1.442	1.263			2.483	3.224	1.141	0.841	1.261
131.997	48.726	78.354	138.195	47.267			2.182	2.543	0.962			2.042	2.783	1.662	2.082	1.782
110.911	99.756	88.181	179.347	69.8			1.482	1.702	1.423			2.643	1.462	1.522	1.261	1.862
128.089	78.633	78.459	202.436	42.472			1.482	1.622	1.403			1.462	1.962	1.482	1.482	1.742
139.29	37.406	91.202	117.883	37.76			1.382	1.241	1.343			2.963	1.562	1.221	1.782	1.982
142.713	68.933	128.256	109.468	66.005			1.361	1.662	1.283			1.682	2.182	1.742	1.902	1.462
82.831	25.406	80.097	102.838	53.096			1.502	0.981	1.243			1.662	1.281	1.422	1.742	1.241
118.025	73.454	90.493	129.046	44.913			1.562	1.462	1.383			1.582	1.402	1.502	1.922	1.241
98.197	44.891	124.896	126.438	61.387			1.261	1.782	1.343			2.002	0.961	1.622	1.141	1.462
110.347	92.359	133.577	123.696	40.934			1.442	2.463	1.122			2.643	1.802	1.502	1.862	1.662
152.745	46.212	96.462	117.527	13.422			1.522	1.221	1.243			1.622	1.622	1.522	1.201	0.681
133.371	68.794	88.619	184.528	51.65			1.502	1.682	2.285			1.341	1.762	1.402	1.862	1.241
161.128	37.884	80.462	120.888	40.474			1.241	2.062	1.944			1.181	1.482	1.522	1.502	1.822
143.63	26.725	110.378	98.947	58.024			1.281	1.722	0.902			1.382	1.762	1.542	1.722	1.982
116.855	26.894	115.014	82.652	58.728			1.582	1.382	1.303			1.762	1.962	1.702	1.402	1.582
149.127	22.916	112.042	121.753	59.857			1.462	1.542	0.902			1.462	1.862	1.562	1.702	1.422
158.368	37.365	102.98	109.489	43.741			1.542	1.301	1.142			1.422	1.702	1.682	1.822	1.542
122.843	95.657	108.459	123.006	43.731			1.482	2.343	1.343			1.341	2.583	1.402	1.241	2.383
116.627	29.543	87.306	97.706	35.273			1.502	1.742	1.162			1.622	1.782	1.301	1.842	1.782
90.391	58.995	85.734	88.315	49.842			1.482	3.204	1.463			1.602	2.383	1.882	1.301	1.121
141.486	35.388	139.433	149.904	69.152			1.602	1.542	1.363			1.462	1.422	1.542	1.562	0.941
131.802	61.253	117.78	96.424	50.116			1.442	1.622	1.243			1.622	0.941	1.702	2.082	1.802
147.208	55.699	83.696	113.5	46.092			1.442	1.682	0.922			1.502	1.562	1.742	1.822	1.922
96.918	26.612	74.766	88.033	86.301			1.402	1.522	1.323			1.402	1.442	1.722	1.702	1.722
107.491	33.159	99.252	182.712	61.421			1.542	1.842	1.603			1.602	1.602	1.822	1.442	1.382
96.791	115.533	89.644	167.298	13.7			2.463	1.161	1.343			1.462	4.265	1.722	1.702	1.041
132.305	77.663	112.872	93.94	13.926			1.341	1.281	1.363			1.402	2.723	1.782	1.862	1.582
113.567	114.365	145.217	106.679	65.513			1.462	1.301	1.603			1.442	3.564	1.882	1.502	1.582
147.557	45.776	196.951	82.647	54.546			1.382	1.522	1.363			1.542	1.982	1.502	1.161	1.522
130.341	39.844	110.622	167.453	68.387			1.622	1.161	1.403			1.321	1.301	1.762	1.582	1.882
150.039	85.09	140.473	183.068	39.959			1.382	1.502	1.202			1.241	1.261	1.442	1.522	2.242
114.614	52.392	77.134	169.475	71.702			1.482	1.822	1.142			1.522	1.341	1.562	1.482	1.722
105.544	79.096	132.817	118.064	58.214			1.442	1.602	1.022			2.082	1.562	1.562	1.161	1.241
106.478	27.905	107.047	121.571	70.342			1.261	1.862	1.303			1.502	1.602	1.682	1.482	1.682
112.576	33.321	108.332	80.199	40.39			1.662	1.462	1.202			1.782	1.462	1.542	1.361	2.122
117.567	95.074	110.737	115.018	61.02			1.562	1.782	0.962			2.823	1.261	1.622	1.582	2.242
132.956	24.309	197.029	113.647	53.595			1.502	1.842	1.383			1.241	8.529	1.762	1.842	1.762
119.088	62.198	182.938	91.766	59.67			2.543	1.702	1.363			1.582	0.881	1.341	1.522	1.922
132.867	31.057	134.546	193.439	60.122			1.281	3.344	1.343			1.522	2.583	1.562	1.181	1.382
115.514	28.147	92.623	152.156	49.474			2.062	1.622	1.202			1.602	1.341	1.902	1.522	1.221
139.417	100.692	86.139	112.147	13.931			1.562	1.622	0.842			1.562	1.542	1.201	1.562	1.462
117.053	98.924	119.108	140.836	40.665			2.363	1.782	1.563			1.462	1.462	1.622	1.862	1.742
131.557	38.962	97.046	108.393	64.263			1.422	1.962	1.543			1.462	1.261	2.943	1.662	1.221
125.552	59.99	76.61	98.627	46.541			1.622	1.842	1.363			1.662	1.221	1.462	1.682	1.862
142.861	62.149	118.187	172.228	13.568			1.582	2.403	1.543			1.502	1.041	1.702	1.061	1.702
116.379	34.147	204.113	96.216	14.182			0.761	0.981	1.463			1.702	1.141	1.382	1.702	1.782
163.289	25.577	134.62	118.83	55.862			1.442	1.662	1.142			1.502	1.221	1.462	0.921	1.982
119.286	115.1	173.91	110.047	64.758			1.562	1.402	0.842			1.622	1.301	1.702	1.782	1.502
135.145	101.854	140.944	114.25	41.029			1.562	1.662	1.223			1.742	1.802	1.542	1.702	0.801
128.756	45.839	140.324	102.436	63.075			1.542	1.722	1.022			1.542	2.002	1.642	1.702	1.041
168.846	40.216	75.462	90.993	64.242			2.883	1.802	1.283			1.562	1.582	1.822	1.522	0.981
169.901	91.775	132.37	102.322	64.728			1.642	1.782	2.024			1.321	1.281	1.802	1.642	1.201
131.889	39.277	121.027	102.352	37.446			1.582	2.963	1.243			1.522	1.101	1.361	1.482	1.842
124.808	59.754	146.502	148.992	44.708			1.562	1.442	1.162			1.662	1.922	1.321	1.301	1.582
144.365	25.893	150.423	98.728	59.319			1.582	1.622	2.345			1.422	1.802	1.582	1.582	1.622
138.648	95.097	143.119	73.484	13.088			1.321	1.622	1.343			1.542	1.822	1.602	2.142	1.602
121.183	94.019	119.895	119.888	40.569			2.663	1.341	1.383			1.281	1.321	1.201	1.622	1.502
101.925	50.344	95.522	127.248	61.2			1.422	1.642	1.383			1.341	1.201	1.842	1.061	1.842
116.036	89.133	113.102	186.29	37.901			1.642	1.682	1.423			1.402	2.463	1.081	2.242	1.041
131.505	66.213	115.643	82.807	30.359			0.861	1.562	1.142			1.582	1.542	1.482	1.662	1.842
127.676	66.942	138.586	131.539	67.238			1.442	1.301	1.243			1.762	0.981	3.924	1.702	1.982
112.311	87.327	121.636	155.646	16.007			1.562	1.562	1.122			1.602	1.722	1.382	1.422	0.801
92.172	64.431	109.888	100.862	14.83			1.442	1.942	1.142			1.462	1.422	1.822	1.562	1.562
123.239	33.406	101.579	140.101	62.28			1.622	1.682	1.363			1.622	1.962	1.682	1.782	1.982
129.419	26.974	122.062	103.737	12.932			1.462	1.622	2.084			1.642	2.002	1.021	2.022	2.042
125.942	77.302	116.452	135.307	40.415			1.081	2.963	0.822			1.462	2.002	1.562	1.442	1.962
121.719	114.096	134.488	182.908	60.082			1.622	1.902	1.343			2.443	1.141	1.542	1.882	1.181
138.755	44.555	116.518	122.105	60.416			1.482	1.442	1.323			1.462	1.802	1.782	1.582	1.762
81.374	53.645	119.248	113.677	55.361			0.761	1.482	1.563			1.321	1.942	1.602	2.122	1.762
133.265	51.689	90.935	122.472	57.309			2.363	1.321	1.423			1.662	2.182	1.341	1.882	1.762
149.665	65.574	90.906	124.755	39.505			1.482	1.502	1.724			1.602	1.402	1.221	1.802	1.341
139.512	78.375	102.999	81.975	54.828			1.321	1.522	1.263			1.582	0.621	1.462	1.762	1.041
149.693	89.665	108.268	92.91	70.068			1.382	1.021	1.463			1.782	1.422	1.782	2.823	1.041
108.436	63.488	86.494	122.622	63.419			1.822	1.522	2.064			1.442	1.522	1.201	1.221	2.122
136.628	110.662	169.49	112.892	13.272			1.622	1.582	1.283			1.602	3.524	1.402	0.861	1.562
126.052	67.674	91.311	88.827	33.596			1.402	1.081	1.363			1.702	1.962	1.442	1.101	1.802
134.616	63.822	102.57	172.382	48.684			1.482	1.662	1.323			1.662	1.702	1.622	1.742	1.582
121.987	79.856	137.663	89.653	58.731			2.202	0.861	1.162			1.602	1.522	1.642	1.862	1.422
100.902	48.494	142.374	138.857	40.128			1.902	1.622	1.463			3.484	1.922	1.822	1.622	1.281
121.967	60.915	133.465	115.115	59.774			2.343	1.382	1.182			1.382	1.382	1.782	1.462	1.722
119.903	28.872	83.905	140.698	31.746			1.602	3.003	1.704			1.602	1.341	1.542	2.002	1.662
107.857	79.526	80.892	119.25	89.002			1.582	1.662	1.603			1.542	1.522	1.642	1.482	1.822
147.826	75.235	128.144	99.725	35.428			1.442	1.281	3.407			2.343	1.622	1.882	1.762	1.842
129.291	117.275	132.953	98.133	39.476			1.462	1.802	1.443			1.542	0.761	1.582	1.542	0.801
125.454	49.186	143.517	114.647	48.998			2.363	1.702	1.463			1.722	1.562	1.321	1.942	1.121
							1.382	1.402	0.842			1.321	1.361	1.702	1.021	1.802
							1.141	1.201	1.202			1.562	1.762	1.221	1.482	1.782
							1.201	1.802	1.303			1.522	1.862	1.602	1.742	1.822
							1.542	1.542	1.062			1.442	1.301	1.081	1.341	1.642
							1.662	1.402	1.363			1.462	2.383	1.862	1.602	1.562
							1.341	1.942	0.842			1.281	1.361	1.662	1.762	1.982
							1.562	1.402	1.283			2.142	1.802	2.803	1.962	1.121
							1.542	1.402	1.283			1.422	1.161	1.562	1.802	1.702
							1.762	1.942	1.383			1.602	1.341	1.301	1.822	1.982
							1.542	1.221	1.303			1.382	8.529	1.562	1.622	2.002
							1.562	1.281	1.343			1.642	2.423	1.642	1.562	1.982
							1.502	1.682	1.643			1.742	1.502	1.442	1.201	1.402
							1.542	1.361	1.463			2.343	1.201	1.502	1.562	1.922
							1.562	2.863	0.962			1.662	1.802	1.642	0.861	1.502
							1.522	1.802	1.423			2.082	1.382	1.542	2.002	1.642
							1.462	1.902	1.623			1.602	1.682	1.442	1.722	1.822
							1.462	1.642	0.942			1.181	1.402	1.642	2.303	1.462
							1.502	1.722	1.363			1.422	1.361	1.522	1.602	2.683
							1.822	1.882	1.182			1.462	1.341	1.281	1.882	1.141
							1.462	1.942	1.243			2.222	2.723	1.562	1.181	2.142
							1.382	1.522	1.583			1.402	3.404	1.241	1.662	1.402
							1.361	1.642	1.403			1.341	1.221	1.742	1.482	1.582
							1.482	1.181	1.182			1.241	1.722	1.582	2.122	1.842
							2.363	2.082	1.182			1.622	1.261	1.742	1.762	1.522
							1.562	1.722	1.162			1.782	1.802	1.361	1.522	2.383
							1.382	1.382	1.343			2.042	1.462	1.321	1.261	1.221
							1.341	1.442	1.122			1.482	4.285	1.161	1.742	1.722
							1.361	1.301	1.303			1.642	1.762	1.522	1.341	1.462
							1.502	1.482	1.303			1.642	1.702	1.862	1.622	1.582
							1.482	1.742	1.463			1.482	1.942	1.502	1.462	2.242
							1.462	1.442	1.303			1.341	1.622	1.321	1.141	1.482
							1.402	1.702	1.503			1.382	1.522	1.442	1.361	1.642
							1.562	1.822	1.303			1.321	1.822	1.382	1.782	1.482
							1.281	1.602	1.283			1.622	1.622	1.762	1.522	1.722
							1.602	1.922	1.964			1.462	0.901	1.442	1.782	1.742
							1.462	1.802	1.223			1.502	1.261	1.762	1.241	1.161
							1.602	1.622	1.363			1.562	3.904	1.762	1.041	2.162
							1.582	1.402	0.902			1.502	1.041	1.442	1.522	1.682
							1.542	1.382	1.283			1.422	1.281	1.522	1.902	1.121
							1.341	1.882	1.223			1.382	1.902	1.081	1.622	1.722
							2.142	1.221	1.403			1.542	1.782	1.602	2.182	1.802
							2.523	1.402	1.022			1.422	1.782	1.201	1.822	2.242
							1.542	1.762	1.323			1.762	1.442	1.402	1.962	1.822
							1.542	1.442	1.343			1.522	1.201	1.702	1.742	2.222
							1.382	1.942	1.543			1.662	1.862	1.582	1.422	2.142
							1.502	1.802	1.383			1.442	0.721	2.943	1.722	3.063
							1.702	1.922	1.243			1.542	3.224	1.842	1.902	2.122
							1.422	1.642	1.002			1.502	1.321	1.462	1.361	1.602
							1.642	1.982	1.263			1.462	1.161	1.662	1.882	1.402
							1.582	1.962	1.263			1.562	1.522	1.341	1.482	2.042
							1.562	1.742	1.423			1.622	1.502	1.902	1.902	1.041
							1.281	1.802	1.844			1.562	0.841	1.702	1.462	1.642
							1.382	1.742	1.784			2.182	1.762	1.361	1.702	1.301
							1.562	0.901	1.303			1.462	1.101	1.542	1.522	1.822
							1.542	1.662	1.423			2.463	1.482	1.642	1.562	1.722
							1.422	2.002	0.982			1.542	1.742	4.225	1.382	3.264
							1.341	1.922	1.363			2.503	1.842	1.602	1.722	0.961
							1.682	1.321	0.962			0.741	1.622	2.162	1.602	1.782
							1.602	1.862	1.643			1.502	1.762	1.462	1.982	2.242
							1.502	1.802	1.162			1.682	1.522	1.482	1.582	1.722
							2.743	1.822	1.263			1.622	1.942	1.722	1.382	1.902
							1.522	1.622	1.243			1.502	1.442	1.682	1.101	1.281
							1.261	1.622	1.162			1.442	1.602	3.143	1.301	2.343
							1.602	0.961	1.323			1.782	1.201	1.862	1.902	1.602
							1.462	1.862	1.283			1.462	2.002	1.382	1.502	1.442
							1.402	1.802	1.583			1.562	1.782	1.301	1.101	1.802
							1.402	1.562	1.423			1.361	2.783	1.602	1.882	1.622
							1.341	2.082	2.084			1.361	1.522	1.442	1.301	1.802
							1.642	1.181	1.383			1.402	1.722	1.722	1.642	2.002
							1.522	0.941	1.343			1.782	1.922	1.181	1.522	1.802
							1.502	1.802	0.842			1.301	2.383	1.361	1.582	1.902
							1.562	1.642	0.942			2.483	1.161	1.602	1.462	1.241
							1.462	1.682	1.283			1.482	1.982	2.202	1.482	1.462
							1.422	1.301	1.383			1.862	1.321	1.582	1.201	2.843
							1.602	1.722	1.243			1.321	1.782	1.482	1.301	0.981
							1.341	1.522	1.363			1.462	1.742	1.642	1.782	1.502
							1.422	2.403	1.062			1.462	1.542	1.021	2.222	1.662
							2.443	1.382	3.547			1.602	1.862	1.402	1.442	1.762
							1.442	1.482	1.283			1.602	1.482	1.221	1.241	1.762
							1.061	1.802	1.303			1.782	1.161	1.602	1.562	1.922
							1.502	1.642	1.223			1.542	0.841	1.462	1.802	1.842
							3.944	1.321	1.643			1.582	1.321	1.422	1.982	1.682
							1.602	1.482	1.403			1.482	1.161	1.582	0.981	2.222
							1.402	2.343	0.822			1.702	1.562	1.301	1.061	2.042
							1.542	1.842	1.303			1.622	1.942	1.642	2.423	1.802
							1.542	1.642	1.603			1.622	1.482	1.622	1.482	1.782
							1.602	1.642	1.383			1.582	1.402	1.662	2.122	1.482
							1.502	1.782	1.122			1.762	1.382	1.662	1.562	1.922
							1.562	1.522	1.924			1.502	1.341	1.802	1.882	1.462
							1.562	1.542	1.263			1.582	1.502	1.542	1.822	1.141
							1.382	1.722	1.323			1.321	1.622	1.642	1.642	1.802
							1.402	1.902	1.363			1.522	1.462	1.562	1.542	2.843
							1.562	1.462	1.363			1.622	1.181	1.722	1.101	1.902
							1.522	1.422	1.223			1.422	1.782	1.502	1.181	2.222
							1.462	1.682	1.563			1.462	2.323	1.422	1.402	1.842
							2.803	2.503	1.202			2.503	0.721	2.403	1.842	1.882
							1.462	1.422	1.503			1.542	1.762	1.041	1.682	0.961
							1.482	1.522	1.463			1.542	1.341	1.221	1.642	0.941
							1.542	1.842	1.463			1.542	1.702	1.261	1.582	1.702
							1.422	1.802	1.523			1.482	1.682	1.722	1.982	1.962
							1.361	1.662	1.082			1.582	1.702	2.022	1.542	1.962
							1.462	1.321	1.263			1.602	1.081	1.762	1.161	1.722
							1.462	1.642	1.603			1.602	3.684	1.482	1.562	1.602
							1.682	1.161	1.583			1.582	2.403	1.482	1.762	1.542
							1.542	1.722	1.243			1.462	1.482	1.702	1.261	1.802
							2.523	1.742	1.463			1.422	1.762	1.402	1.682	0.701
							1.001	1.862	0.922			1.622	1.562	1.662	1.101	1.542
							1.462	1.602	1.202			1.742	1.181	1.642	2.042	1.902
							1.221	1.882	1.363			1.942	2.002	1.321	1.281	1.782
							1.602	1.662	1.704			1.402	1.662	1.662	1.662	1.562
							1.422	1.842	0.842			1.582	1.522	1.301	1.141	3.143
							0.861	1.321	1.303			1.542	1.522	1.602	1.402	1.482
							1.382	1.201	1.864			1.582	1.321	1.361	1.622	1.261
							2.363	1.321	2.746			1.742	2.723	1.281	1.382	1.942
							1.281	3.103	1.383			1.602	1.842	1.622	1.962	1.321
							1.642	1.782	1.403			1.602	1.542	1.762	1.662	1.922
							1.742	1.722	1.403			1.522	1.261	1.462	1.101	1.722
							1.341	2.343	1.984			1.582	1.361	1.742	1.642	2.162
							1.602	1.642	1.503			1.442	1.422	1.221	1.522	2.042
							1.662	1.722	1.303			1.482	1.161	1.522	1.361	1.281
							1.382	1.842	1.964			2.002	1.622	1.422	1.221	1.201
							1.382	1.502	1.142			1.782	1.181	3.023	1.682	2.042
							1.482	1.722	1.583			1.722	1.722	1.221	1.261	1.241
							1.562	1.361	1.443			1.662	2.583	1.522	1.742	3.204
							1.642	1.642	1.383			1.682	3.123	1.462	1.862	2.062
							1.462	1.762	1.162			1.602	1.141	1.462	1.642	2.162
							1.482	1.642	2.245			2.483	1.081	1.502	1.261	2.242
							1.382	1.522	1.744			1.402	1.402	1.602	1.782	1.782
							2.383	1.722	2.024			2.102	1.762	1.742	1.582	1.382
							2.803	1.361	1.102			1.502	1.502	1.642	2.062	1.502
							1.422	1.602	1.583			1.502	3.924	1.041	1.602	1.041
							1.382	1.301	1.503			1.622	1.762	1.021	1.922	1.121
							1.402	1.402	1.303			1.382	1.321	1.181	1.101	1.822
							2.543	1.462	1.223			1.442	1.502	1.402	1.862	1.622
							1.462	1.662	1.062			1.502	2.102	1.542	1.482	1.442
							1.281	1.502	1.343			1.542	0.881	1.081	1.782	0.641
							2.222	1.161	1.864			1.622	1.021	1.662	1.442	1.942
							1.562	1.562	1.303			1.442	1.922	0.881	1.962	0.861
							1.442	1.462	1.663			1.722	0.961	1.662	1.642	3.564
							1.602	1.682	1.583			1.542	1.221	1.682	1.261	1.382
							1.502	1.121	1.443			1.662	1.742	1.341	1.562	1.962
							1.542	1.582	1.363			2.062	1.702	1.642	1.562	1.201
							1.402	1.482	2.365			1.462	1.842	1.642	1.021	3.444
							1.602	1.742	1.263			1.702	1.582	3.063	1.542	2.002
							1.442	1.722	1.182			1.502	3.364	1.482	1.101	1.361
							1.602	1.702	1.202			1.542	1.422	1.602	1.221	1.422
							1.822	1.442	2.365			2.623	1.562	1.582	1.862	1.682
							1.382	1.542	2.225			1.662	1.181	1.682	2.022	1.962
							1.281	1.782	1.643			1.542	1.382	1.321	2.303	0.901
							1.402	1.522	1.363			1.462	1.402	1.582	1.882	1.622
							1.622	1.502	1.142			1.522	1.622	1.602	1.702	1.782
							1.502	1.141	1.603			1.361	1.942	1.842	1.662	1.722
							1.502	3.103	2.966			1.782	0.501	2.923	1.782	3.984
							1.221	1.722	0.962			1.422	1.542	1.341	1.682	1.301
							1.402	1.782	1.162			1.622	1.702	1.462	1.842	2.002
							1.422	1.722	1.643			1.662	1.662	1.462	1.141	1.582
							1.642	1.522	1.804			1.361	1.682	1.822	1.522	1.101
							1.562	2.022	2.345			1.702	1.261	1.582	1.882	1.522
							1.482	1.642	0.902			1.462	1.281	1.402	1.882	1.582
							1.462	1.902	1.523			2.763	1.261	1.502	1.842	3.824
							2.543	3.103	1.363			3.143	1.422	1.722	1.442	1.782
							1.502	1.261	1.323			1.522	1.502	1.702	1.041	0.721
							2.703	1.281	0.842			2.082	1.502	1.522	1.882	1.462
							1.802	1.502	1.623			1.542	1.502	1.602	1.281	1.422
							1.542	1.281	1.383			1.642	1.542	1.642	1.702	1.742
							1.482	1.442	0.962			1.682	1.502	1.462	1.542	1.041
							1.522	1.181	1.443			1.602	1.281	1.782	1.882	1.682
							1.502	1.722	1.463			1.742	2.383	1.462	1.822	1.702
							1.462	1.341	1.784			1.622	1.862	1.462	1.842	1.722
							1.442	0.861	1.784			1.341	4.625	1.582	1.922	1.882
							1.482	1.462	2.225			1.482	1.382	1.682	1.582	1.842
							1.542	1.642	1.523			1.442	1.762	2.323	1.702	1.982
							1.482	1.942	1.323			0.741	2.222	1.402	1.862	1.702
							1.662	0.981	1.443			1.662	1.361	1.321	1.542	1.502
							1.422	1.281	1.423			1.542	0.661	1.482	0.861	0.601
							1.602	1.261	1.443			1.562	1.402	1.502	1.522	1.522
							1.442	1.281	1.062			1.361	1.902	1.422	1.842	1.161
							1.442	1.582	1.303			1.622	1.041	1.782	1.922	1.702
							1.622	2.002	1.283			1.522	1.662	1.602	1.862	1.842
							1.502	1.181	1.223			1.722	0.641	1.241	1.682	1.762
							1.281	1.622	1.202			1.402	1.001	1.742	1.562	2.383
							1.482	1.181	1.784			1.562	1.842	1.041	1.842	1.482
							1.522	2.763	1.724			1.482	0.661	1.662	1.101	1.622
							1.341	1.181	1.182			1.502	1.802	1.522	1.482	1.562
							1.001	1.301	1.784			1.502	1.662	1.742	1.121	2.262
							1.642	1.742	1.603			1.321	1.682	1.321	1.221	1.842
							1.522	1.902	1.483			1.622	1.842	1.341	1.101	0.681
							1.502	1.582	1.423			3.224	1.622	1.642	1.061	2.303
							1.702	1.582	1.443			1.542	1.141	1.422	1.522	1.542
							1.662	1.942	1.503			1.321	1.462	1.622	1.522	1.782
							3.063	1.982	1.283			1.602	1.822	1.021	1.622	1.982
							1.522	1.442	1.463			1.402	1.341	1.702	1.502	2.242
							1.562	1.241	1.583			1.442	1.502	1.802	1.722	2.222
							0.861	1.882	1.303			1.462	1.402	1.181	1.502	1.402
							1.522	1.682	1.443			1.482	2.022	1.422	1.562	1.382
							1.422	1.582	0.902			1.582	1.402	1.622	1.201	1.221
							2.863	1.161	1.563			1.542	1.702	1.802	1.862	1.902
							1.442	1.542	0.902			1.662	1.402	1.462	1.842	1.922
							1.502	3.424	0.982			1.522	1.942	1.602	1.522	1.842
							1.382	1.101	1.303			1.361	1.562	1.722	1.562	2.002
							1.542	1.562	1.122			1.582	1.762	1.121	1.662	1.942
							1.522	1.682	2.024			1.682	1.422	1.522	1.662	1.422
							1.382	1.341	1.243			2.723	1.482	1.582	1.382	1.862
							1.502	1.722	2.064			1.462	1.462	1.221	1.662	1.702
							1.341	1.742	1.543			1.702	1.402	1.682	1.722	2.122
							1.462	2.743	1.563			1.341	2.222	1.482	1.982	1.522
							1.462	1.261	1.543			1.582	1.361	1.642	1.361	1.982
							1.402	1.682	1.643			1.482	1.041	1.442	1.642	1.121
							1.762	1.902	1.223			1.482	2.062	1.702	1.602	2.182
							1.562	1.361	2.525			1.402	1.642	1.281	2.523	2.082
							1.622	1.982	1.323			1.502	3.544	1.061	1.482	1.582
							1.502	1.862	1.563			1.201	1.402	1.702	0.881	1.862
							1.321	1.942	1.202			1.662	1.241	1.742	1.382	1.882
							1.502	1.842	1.202			1.482	1.241	1.642	1.622	1.261
							1.462	1.001	1.363			2.082	1.822	1.341	1.241	1.942
							1.742	2.022	1.724			1.522	2.102	1.542	1.582	1.422
							1.542	3.244	1.303			1.522	1.962	1.462	1.382	2.162
							1.382	1.522	1.503			1.722	0.761	1.842	1.662	1.582
							1.422	1.802	3.006			1.802	1.502	1.582	1.662	1.101
							1.442	1.782	2.966			1.702	1.402	1.422	1.361	1.662
							1.562	1.642	1.223			1.602	2.202	1.542	1.522	1.722
							1.722	2.943	1.403			2.222	1.502	1.382	1.842	1.422
							1.602	1.482	1.523			1.682	1.341	1.582	1.742	1.902
							1.281	1.462	1.944			1.722	2.423	1.582	1.261	2.303
							1.482	1.161	0.701			1.442	1.221	1.642	1.982	2.082
							1.341	1.642	2.325			2.443	1.482	1.201	1.602	1.862
							1.522	1.582	1.463			1.462	1.722	1.562	1.742	1.382
							1.482	1.782	2.325			1.642	1.622	1.562	1.702	1.602
							1.402	1.622	1.383			2.563	1.161	1.802	1.682	1.422
							1.582	1.422	2.225			1.662	1.502	1.422	1.742	1.782
							1.422	1.902	1.303			1.462	1.842	1.702	1.582	1.442
							1.402	1.442	0.842			1.301	1.422	1.442	1.482	1.382
							1.341	1.562	1.363			1.682	1.261	1.382	1.662	1.642
							1.281	2.603	1.603			1.301	2.142	1.382	1.582	1.422
							1.422	1.682	1.523			1.662	1.562	1.622	1.862	1.842
							1.061	1.602	1.223			1.602	1.622	1.702	1.201	1.922
							1.221	1.862	1.162			1.482	3.504	1.562	1.522	0.641
							1.502	1.442	0.962			1.622	1.742	1.702	1.522	2.242
							1.682	1.602	1.463			1.982	1.261	1.462	1.522	1.422
							2.343	1.321	1.283			1.502	1.602	1.422	2.242	2.122
							1.542	1.562	1.563			1.982	1.522	1.382	1.962	0.921
							1.522	1.622	1.643			1.482	1.782	1.321	1.582	2.082
							1.622	1.862	1.423			1.542	1.562	2.943	1.361	1.822
							1.462	2.403	1.744			1.742	1.922	1.522	1.922	1.882
							1.402	1.802	1.403			1.321	1.261	1.321	1.522	1.922
							1.502	1.382	1.563			1.562	1.341	1.321	1.602	1.782
							1.502	1.622	1.443			1.402	1.922	1.522	1.762	2.162
							3.944	1.061	1.323			1.622	2.082	1.241	1.782	1.502
							1.522	1.261	1.623			1.382	1.402	1.782	1.722	1.922
							1.762	1.602	1.062			1.562	1.682	1.802	1.201	1.321
							2.803	1.642	1.243			1.361	1.281	1.702	1.642	1.502
							1.742	1.722	0.842			1.422	1.542	1.762	1.642	1.782
							1.462	1.662	1.323			1.522	3.364	1.582	2.002	2.182
							1.382	1.562	1.223			1.702	1.382	1.562	1.602	0.981
							1.482	1.722	1.463			1.542	2.283	1.662	1.902	1.982
							1.261	2.663	1.523			1.382	2.022	1.762	1.602	1.562
							1.482	1.762	1.263			1.642	1.622	1.542	2.082	1.542
							1.101	2.863	0.822			1.702	1.361	1.542	1.562	1.442
							1.382	1.422	1.543			1.542	1.922	1.822	2.062	1.662
							1.041	1.902	1.223			1.502	1.341	1.542	1.101	1.702
							1.081	1.141	1.042			1.502	1.301	1.822	1.742	1.702
							1.462	1.702	1.343			1.522	1.602	1.522	2.062	1.802
							1.422	1.582	1.443			1.642	1.742	1.562	1.041	1.982
							1.422	1.642	1.283			1.662	2.663	1.702	1.642	1.522
							1.382	1.462	1.523			1.602	1.762	1.201	1.822	1.382
							1.602	1.722	1.323			1.422	1.642	1.602	0.861	1.121
							1.562	1.462	1.223			1.642	1.682	1.522	1.482	0.841
							1.382	1.442	1.162			1.542	1.522	1.321	1.061	0.941
							1.321	1.642	0.942			1.662	1.261	1.061	1.682	2.042
							1.081	1.301	1.303			1.622	1.922	1.442	1.622	1.602
							1.341	1.862	1.223			1.542	1.281	1.502	1.922	0.921
							1.422	1.622	1.263			1.502	1.081	1.422	1.241	1.562
							1.622	1.622	1.784			2.082	1.361	1.582	1.702	1.382
							1.462	1.642	1.563			1.542	1.762	1.462	2.242	1.542
							1.382	1.281	1.102			1.542	1.281	1.622	1.762	0.901
							1.402	1.682	1.623			3.123	1.782	1.742	1.462	1.982
							1.562	1.542	1.383			1.522	1.462	1.562	1.782	1.922
							1.201	1.642	2.024			1.462	1.301	1.301	1.882	1.802
							1.442	1.341	2.185			1.602	2.343	1.241	1.782	1.642
							1.522	2.943	2.505			1.602	1.582	1.321	0.941	1.842
							1.642	1.942	2.385			1.602	1.862	1.321	1.722	1.902
							1.321	1.502	2.465			1.562	1.702	1.602	1.882	1.001
							1.502	1.662	1.363			1.622	1.502	1.662	1.321	1.682
							1.542	1.261	1.263			1.422	1.582	1.722	1.382	1.822
							1.321	1.422	1.323			2.763	1.662	1.582	1.522	1.922
							1.201	1.782	1.824			1.542	1.021	1.562	1.982	1.562
							1.722	1.722	1.543			2.763	1.902	1.341	1.622	3.103
							1.522	1.422	1.403			1.402	1.061	1.542	1.422	1.261
							1.422	1.361	1.423			1.261	1.782	2.162	1.882	1.702
							1.402	1.001	1.323			1.622	1.321	1.422	1.462	1.582
							1.502	1.502	1.463			1.622	1.822	1.502	1.602	1.922
							1.402	1.862	1.363			1.722	1.502	1.201	2.403	1.722
							1.442	1.462	1.483			1.361	3.664	1.502	1.582	1.742
							1.602	2.723	1.423			2.082	1.682	1.802	1.582	1.882
							1.442	1.682	0.842			1.462	0.701	1.422	1.862	1.762
							1.301	1.982	1.142			1.762	3.364	1.482	1.562	1.722
							1.502	1.782	1.303			1.321	1.181	1.522	1.962	1.842
							1.422	1.622	1.102			1.361	1.422	1.642	1.602	0.981
							1.402	1.642	0.962			1.281	1.722	1.041	1.402	1.201
							1.522	1.782	1.303			1.422	1.942	1.602	1.962	1.462
							1.382	1.722	4.068			1.181	1.442	1.782	1.562	1.762
							1.402	1.422	1.443			1.281	1.261	1.602	1.562	2.142
							1.382	1.942	1.263			1.542	1.842	1.622	1.341	1.942
							1.341	1.642	1.503			1.562	1.101	1.642	1.041	2.082
							1.502	1.642	1.202			1.281	2.343	0.581	1.722	1.522
							1.522	1.642	1.062			1.662	1.762	1.482	1.582	1.462
							1.402	1.662	2.245			1.361	2.022	1.422	1.642	1.462
							1.542	1.762	1.383			1.422	1.442	1.261	1.882	1.762
							1.462	1.702	1.864			1.462	1.722	1.582	1.642	1.281
							1.502	1.261	1.303			1.642	1.482	1.522	1.522	1.382
							1.662	1.502	1.162			1.602	1.942	1.462	1.902	2.383
							1.361	1.361	1.603			1.782	4.825	1.542	1.341	1.361
							1.241	1.442	1.523			1.622	1.582	1.442	1.482	1.462
							1.462	1.942	2.706			1.602	1.802	1.502	1.482	1.842
							1.442	1.762	1.463			1.522	2.182	1.702	1.622	1.001
							1.502	1.762	2.164			1.442	1.301	1.522	1.642	1.842
							1.462	3.003	1.263			1.562	1.341	1.862	1.842	1.442
							1.321	1.482	1.643			1.562	1.402	1.382	1.442	0.721
							1.582	1.702	0.902			1.341	1.842	1.642	1.722	1.482
							1.582	1.522	1.042			1.462	3.664	1.642	1.662	1.382
							1.382	1.762	2.225			1.341	1.442	1.602	1.301	1.442
							1.522	2.222	1.984			1.662	1.762	1.542	1.742	1.261
							1.422	1.522	1.423			1.542	1.301	1.562	2.002	1.722
							1.442	1.301	1.463			1.722	1.822	1.462	1.682	1.041
							1.402	1.842	1.884			1.402	1.742	1.642	1.642	1.782
							1.382	1.582	1.463			1.482	1.402	1.702	1.542	1.762
							1.041	1.622	1.162			1.281	1.502	1.662	1.602	1.722
							1.602	1.782	1.122			1.361	1.762	1.802	1.602	1.782
							2.363	1.582	1.383			1.582	2.323	1.662	1.562	1.462
							1.301	3.344	1.303			1.742	1.422	1.542	1.542	2.242
							1.602	1.522	1.563			1.402	1.762	1.702	1.361	1.782
							1.542	1.121	1.343			1.602	2.162	1.602	1.442	4.004
							1.502	1.522	1.543			1.422	4.545	1.341	1.642	1.221
							1.602	1.181	4.81			2.643	1.301	1.081	1.702	2.002
							1.722	1.782	1.583			1.582	1.582	1.442	3.204	1.562
							1.402	1.662	1.303			1.642	1.522	1.702	2.222	1.682
							1.582	1.742	0.922			1.482	2.222	1.221	1.462	1.842
							1.522	1.722	1.383			1.382	1.802	1.522	1.462	1.842
							2.703	1.562	1.483			1.422	1.341	1.702	1.882	1.382
							1.201	1.562	1.583			1.582	1.662	1.702	1.602	1.542
							1.602	1.782	1.423			1.462	1.301	1.542	1.962	1.542
							1.361	1.982	1.122			1.582	1.201	0.581	1.101	1.281
							1.562	1.782	1.523			1.321	2.823	1.422	1.141	1.942
							1.402	1.882	1.383			1.602	1.442	1.862	1.562	1.702
							1.582	1.201	1.423			1.522	1.662	1.442	1.722	1.221
							1.562	2.022	1.182			1.842	1.462	1.502	1.622	1.762
							1.622	1.962	1.042			1.602	1.602	3.083	2.142	2.062
							1.522	1.261	1.343			1.822	1.742	1.702	1.261	1.982
							1.542	1.702	1.162			1.562	1.742	1.522	2.182	1.462
							2.923	1.301	1.323			1.702	1.041	1.482	1.161	1.642
							2.943	2.182	1.563			1.822	1.261	0.681	1.442	1.682
							1.542	1.742	1.202			1.602	1.341	1.382	1.402	1.742
							1.542	1.602	1.223			1.522	1.762	1.502	1.902	2.002
							1.141	1.742	1.603			1.321	2.463	1.442	1.862	1.121
							1.341	1.221	1.423			1.422	2.102	1.281	1.562	1.842
							1.522	1.542	1.724			1.181	1.502	1.722	1.141	1.261
							1.361	1.301	0.822			1.402	1.722	1.261	1.722	1.702
							1.402	1.482	1.303			1.602	3.023	1.662	1.862	1.902
							2.743	1.301	1.583			1.742	3.524	1.702	2.002	2.102
							1.422	1.822	0.962			1.642	1.642	1.542	1.161	1.782
							1.502	1.161	1.443			1.822	1.582	1.101	1.522	2.242
							1.582	1.462	1.363			1.562	1.702	1.742	1.822	1.261
							1.642	1.682	1.343			1.542	4.044	1.662	1.662	1.642
							1.562	1.622	0.982			1.462	1.402	2.943	1.782	2.162
							1.422	1.682	1.443			1.702	1.442	1.562	1.902	2.723
							1.682	1.842	1.563			2.443	1.722	4.225	1.602	1.822
							1.482	1.161	1.724			1.822	1.361	1.301	1.722	2.403
							1.642	1.321	3.407			1.402	1.562	1.702	1.141	1.582
							1.502	1.602	3.547			1.602	1.482	1.462	1.962	1.542
							1.462	1.862	1.343			1.482	1.081	1.662	1.702	1.842
							1.241	1.622	1.623			1.842	1.542	1.642	1.522	1.682
							1.402	3.344	1.162			1.462	1.802	1.382	1.562	2.022
							1.382	1.882	1.062			1.402	4.285	1.442	1.822	2.923
							1.502	1.281	1.363			1.321	1.582	1.502	1.882	1.822
							1.462	1.542	1.383			1.622	1.802	1.462	1.522	2.182
							1.582	1.682	1.162			1.562	0.741	1.261	1.962	1.862
							2.142	1.902	1.263			1.482	1.201	1.482	1.722	1.842
							2.663	1.141	0.962			1.622	2.383	1.642	2.062	1.842
							0.881	1.862	1.483			1.762	3.924	1.542	2.022	1.982
							2.923	1.682	1.022			1.341	1.041	1.642	1.622	1.121
							1.361	1.742	1.704			1.341	1.562	2.142	1.802	1.402
							1.341	1.382	1.643			1.542	1.341	1.542	1.582	1.802
							1.341	1.301	1.182			1.562	1.442	1.522	1.802	1.562
							1.562	1.462	1.603			1.602	1.742	1.662	1.722	1.382
							1.402	1.842	1.363			1.502	1.962	1.602	1.762	1.702
							1.602	1.902	1.403			1.622	1.582	1.502	1.962	1.622
							1.281	1.382	1.323			1.442	1.622	1.862	1.562	1.762
							1.662	1.161	2.205			3.404	2.162	1.482	1.382	1.101
							1.482	1.442	1.403			1.942	1.582	1.442	1.201	1.402
							1.422	1.181	1.463			1.622	1.422	1.942	1.702	1.482
							1.422	1.822	1.323			1.402	1.862	1.702	1.862	1.602
							1.562	1.382	0.942			2.663	1.862	1.642	1.622	1.502
							3.123	3.424	0.902			1.742	2.182	1.582	1.602	1.382
							1.642	1.862	1.463			1.462	1.442	0.721	1.782	2.723
							1.542	1.762	1.443			1.782	1.902	1.842	1.802	2.022
							1.542	1.542	1.663			1.321	1.382	1.582	1.041	1.121
							1.482	1.662	1.062			2.603	1.742	1.562	1.962	1.882
							1.742	2.823	1.724			3.484	1.442	1.422	1.782	3.103
							1.542	1.702	0.782			1.702	3.744	1.742	1.482	0.581
							1.502	1.942	1.563			1.341	1.141	1.762	1.622	1.622
							1.462	1.822	2.505			1.321	1.442	1.281	1.462	1.942
							2.843	1.922	3.307			1.742	1.822	1.642	1.161	1.762
							1.642	1.382	1.202			1.642	1.862	1.382	1.562	2.162
							1.261	1.642	1.643			1.442	1.321	1.722	2.523	2.042
							1.422	1.622	1.483			1.602	1.341	1.742	1.742	2.002
							1.422	1.181	1.383			1.622	1.121	1.702	1.562	1.281
							2.663	1.722	1.082			1.842	1.602	1.301	1.962	1.422
							1.101	2.283	1.223			1.241	1.482	1.522	1.922	1.722
							1.422	1.622	1.483			1.261	1.922	1.341	2.062	1.442
							1.361	1.882	1.543			1.582	1.742	1.281	1.722	1.602
							1.422	1.762	1.343			1.602	1.722	1.482	1.241	1.562
							1.542	1.141	1.182			1.542	1.301	1.622	1.762	1.382
							1.802	1.562	0.862			1.462	1.742	2.042	1.982	1.281
							1.802	1.522	1.603			1.542	1.181	1.582	1.762	1.642
							1.502	1.722	1.724			1.722	1.241	1.622	1.902	1.862
							1.041	2.042	1.423			1.462	1.341	1.622	1.061	1.462
							1.562	1.261	1.543			2.303	1.942	1.702	2.222	2.182
							1.522	1.462	1.263			1.562	1.221	1.361	1.422	1.682
							1.722	1.522	1.202			1.582	3.924	1.622	1.862	1.722
							1.422	1.582	1.443			1.382	1.221	1.502	1.802	2.042
							1.502	1.382	1.182			1.502	1.822	1.021	1.822	1.842
							1.281	1.542	1.423			1.582	1.502	1.241	1.862	1.842
							1.562	1.982	1.202			1.622	1.802	0.541	1.842	1.261
							1.582	1.021	1.764			1.702	1.742	1.602	1.642	1.802
							1.702	1.602	1.443			1.582	1.502	1.622	1.722	1.782
							1.161	1.321	1.162			1.542	1.582	1.482	1.642	4.004
							1.321	1.141	1.162			0.761	1.402	1.241	0.941	1.402
							1.522	1.642	1.343			2.283	1.602	1.782	1.301	1.321
							1.502	1.882	1.243			1.622	1.422	1.061	1.842	0.881
							1.442	2.002	1.443			1.782	1.782	1.602	1.502	1.722
							2.803	3.163	1.523			1.542	1.442	1.522	1.562	1.802
							1.562	1.602	1.162			3.143	1.842	0.581	2.122	1.802
							2.543	1.662	1.343			1.542	1.201	1.542	1.742	0.661
							1.522	1.482	1.383			1.562	2.303	1.522	1.462	1.261
							1.542	1.361	1.543			1.502	1.742	1.702	1.882	1.622
							1.542	1.622	1.363			1.662	2.042	1.602	1.141	0.961
							1.542	1.882	1.303			1.502	1.281	1.562	1.522	1.822
							1.602	1.682	1.523			1.402	1.261	1.442	1.922	1.782
							1.562	1.582	1.643			1.502	1.161	1.582	1.702	1.482
							2.763	1.822	1.363			1.341	1.522	1.682	2.182	1.562
							1.502	2.002	1.383			1.502	1.462	1.582	1.962	1.862
							1.402	1.462	1.363			1.321	1.782	1.321	1.462	1.542
							2.723	3.344	1.202			1.462	1.442	1.482	1.642	1.281
							1.241	1.622	1.343			1.702	1.442	1.782	1.662	1.502
							1.462	1.502	1.022			1.562	1.341	1.622	1.782	2.162
							1.482	1.301	1.263			1.622	1.221	0.681	1.402	2.303
							1.482	1.862	1.583			1.382	1.422	1.662	1.682	1.742
							1.382	3.684	1.142			1.622	1.482	1.562	1.842	1.722
							1.482	1.261	1.323			1.682	1.902	1.622	1.882	1.582
							1.662	1.682	1.463			1.442	1.602	1.422	1.862	1.642
							1.382	1.522	1.283			2.663	1.402	1.722	2.122	2.082
							1.522	1.802	2.345			1.722	1.402	1.822	2.082	1.221
							1.602	1.742	1.283			1.562	1.482	1.562	2.142	1.642
							1.281	1.321	1.563			1.682	2.202	1.221	1.582	1.662
							1.361	1.582	1.263			1.602	1.502	1.662	1.782	0.701
							1.402	1.141	1.343			1.502	1.682	1.602	1.181	1.261
							1.482	1.882	1.844			2.683	1.842	1.402	1.642	1.442
							1.542	4.205	0.962			2.082	1.281	1.121	1.462	1.542
							1.542	1.702	1.563			1.361	1.462	1.582	1.762	1.482
							3.063	1.442	2.746			1.422	1.842	1.562	1.842	2.383
							1.642	1.642	1.263			1.622	1.502	1.662	1.662	1.542
							1.802	1.301	1.403			1.622	1.922	0.721	1.101	1.682
							1.341	1.662	1.162			1.602	4.265	1.422	1.742	1.942
							1.522	1.301	1.463			1.662	1.742	1.522	1.922	1.422
							1.502	1.862	1.162			1.722	1.982	1.502	1.662	1.542
							1.482	1.642	1.563			1.562	1.662	1.782	1.902	1.482
							2.983	1.682	1.563			1.482	1.502	1.742	1.261	1.422
							1.562	1.462	1.704			1.482	1.021	1.562	1.021	2.122
							1.422	1.622	1.363			1.642	0.981	1.562	1.962	1.542
							1.582	1.902	0.842			1.422	1.382	1.582	1.321	1.702
							1.382	2.082	2.245			1.682	1.161	1.522	1.962	2.843
							1.402	1.582	1.223			1.602	1.422	1.822	1.902	1.281
							1.301	1.542	0.942			1.482	1.662	1.542	1.101	1.502
							1.522	1.722	1.202			1.261	1.962	2.323	1.321	2.062
							1.402	1.682	1.623			1.642	1.502	1.782	1.221	1.582
							1.041	1.862	1.363			1.502	2.323	1.562	1.602	1.582
							1.422	1.161	1.303			1.542	1.742	1.722	1.221	1.962
							1.642	1.702	1.724			1.462	1.221	1.241	0.861	1.862
							1.582	1.722	1.463			1.442	1.702	1.522	2.823	2.042
							1.702	1.562	1.303			1.462	1.742	1.502	1.562	1.542
							1.321	1.942	1.283			1.642	1.542	1.702	1.902	2.062
							1.562	1.842	0.902			1.582	1.021	1.742	1.642	1.822
							1.321	1.361	1.383			1.702	1.902	1.422	1.361	1.842
							1.341	1.502	1.062			1.522	0.721	1.702	1.882	1.722
							1.582	1.862	1.483			1.422	1.382	1.442	1.742	1.241
							1.341	1.942	1.804			1.742	1.021	1.402	1.862	1.121
							1.422	1.762	2.505			1.442	1.021	1.622	1.802	3.043
							1.562	1.662	0.962			1.442	1.862	1.682	1.562	1.702
							1.582	1.942	1.964			1.482	0.641	1.662	1.742	1.382
							1.041	1.522	0.922			1.382	1.562	0.581	1.542	1.802
							1.422	1.682	1.563			2.923	1.201	1.562	1.181	1.261
							1.482	1.462	2.205			1.402	1.842	1.682	1.742	1.802
							1.402	1.582	1.663			1.361	1.402	1.301	1.682	1.201
							1.402	1.642	1.483			1.341	1.722	1.061	1.862	1.902
							1.402	1.502	1.202			2.202	1.922	1.662	1.702	1.562
							1.482	1.442	1.263			1.822	1.321	1.502	2.022	1.321
							1.361	1.742	1.223			1.542	1.682	1.662	1.862	2.122
							1.602	1.742	1.263			1.181	1.422	1.642	1.622	1.502
							1.341	1.321	1.363			1.502	2.182	1.522	1.061	1.762
							1.402	1.742	1.503			2.623	2.162	1.602	1.341	0.961
							1.662	2.022	1.784			1.642	1.662	1.542	1.021	4.004
							1.642	1.642	1.383			1.602	1.562	1.662	1.762	2.022
							1.422	1.442	1.623			1.442	1.862	1.221	1.422	1.201
							1.582	1.402	0.902			1.642	3.003	1.622	1.802	1.402
							2.703	2.082	1.443			1.482	1.161	1.702	1.582	1.181
							1.542	1.482	1.704			1.341	2.583	1.522	2.403	1.922
							1.301	1.402	1.784			1.662	1.101	1.622	1.882	0.581
							1.442	2.723	1.523			1.582	0.961	1.582	1.542	0.641
							1.822	1.662	1.263			1.642	1.021	1.462	1.241	1.442
							1.682	1.862	1.223			2.483	1.522	1.121	1.702	0.981
							1.402	1.602	0.862			1.542	1.802	1.502	2.002	1.201
							1.001	1.622	1.423			1.702	1.281	1.442	1.742	1.862
							1.422	1.882	1.323			1.382	1.522	1.762	1.722	1.922
							2.303	1.462	2.084			1.261	1.942	1.341	2.182	1.842
							1.542	1.742	2.205			1.402	2.723	1.662	1.321	0.861
							1.502	1.141	1.383			1.602	1.962	1.382	1.802	1.842
							1.502	1.642	1.683			1.482	1.321	1.702	1.842	1.281
							1.361	1.842	1.263			1.622	1.622	1.622	1.902	1.782
							1.522	1.582	1.423			2.483	1.161	1.642	1.482	1.742
							1.201	2.723	1.563			2.743	2.162	1.762	1.101	2.182
							1.422	1.722	1.423			1.462	1.602	1.462	1.622	2.062
							1.562	1.081	1.343			1.722	1.642	1.722	1.982	1.762
							1.722	1.522	2.245			1.662	1.442	1.622	1.281	1.542
							1.682	1.722	1.142			1.662	1.041	1.261	1.662	1.962
							1.462	1.542	1.303			1.341	3.123	1.642	1.622	1.842
							1.482	1.582	1.202			2.743	1.482	1.822	2.082	1.622
							1.602	1.922	1.683			1.562	1.382	1.482	1.602	1.622
							1.482	3.244	1.062			1.702	2.242	1.702	1.782	1.642
							1.341	1.902	1.463			1.662	1.722	1.502	1.902	1.902
							1.462	1.962	1.263			1.662	1.622	1.081	1.382	1.662
							1.462	1.462	1.363			1.382	1.942	1.382	2.903	1.121
							1.141	1.642	1.603			1.382	1.482	1.522	1.782	1.281
							1.722	1.502	1.162			1.662	3.043	1.662	1.542	1.041
							1.722	1.382	1.984			1.602	0.541	1.622	1.241	2.383
							2.523	1.382	1.363			1.662	0.641	1.542	1.722	1.021
							1.542	1.121	1.263			1.802	1.802	1.582	1.782	1.702
							1.502	1.081	1.764			2.443	1.081	1.482	1.502	3.043
							2.523	1.462	1.343			1.642	1.622	1.682	1.782	1.422
							1.241	1.161	1.463			1.402	1.281	1.822	1.862	1.602
							1.742	1.822	1.443			1.622	1.482	1.482	1.522	1.522
							1.602	1.402	1.944			1.502	1.241	1.642	1.602	1.121
							2.763	1.922	1.403			1.361	1.922	1.582	1.582	1.942
							1.462	2.062	0.822			2.623	1.502	1.522	1.562	2.002
							2.663	0.801	1.082			3.404	1.081	1.482	1.602	1.261
							1.602	2.963	1.363			2.483	1.522	1.482	1.321	2.082
							1.562	1.321	1.563			1.702	2.002	1.742	1.762	2.122
							1.502	1.782	1.583			1.722	1.341	1.361	1.822	2.162
							1.542	1.802	1.122			3.224	1.402	1.642	1.502	1.422
							1.482	1.622	1.202			1.422	1.782	1.101	1.642	1.822
							2.363	1.502	1.283			1.582	0.901	1.241	1.642	1.221
							1.482	1.662	2.365			1.502	1.482	1.281	1.662	0.961
							1.522	1.442	0.962			1.241	1.402	2.943	1.802	1.021
							1.462	1.161	1.303			1.622	1.522	1.422	0.841	1.842
							1.061	1.081	1.343			1.662	1.702	1.602	1.201	1.482
							1.502	1.862	1.663			2.062	1.261	1.682	1.141	1.982
							1.442	1.622	1.864			1.562	1.021	1.582	1.582	2.202
							1.622	1.642	1.182			1.762	1.682	1.301	1.662	0.721
							1.502	1.041	1.483			1.562	1.902	1.522	1.762	2.142
							1.522	1.742	0.902			1.562	1.422	1.462	1.922	1.642
							1.402	1.482	1.162			1.622	2.343	1.602	1.902	1.121
							1.482	1.662	1.383			1.442	1.341	1.722	1.662	1.121
							1.382	1.101	1.303			2.122	0.661	1.281	1.141	1.842
							1.442	1.762	1.323			1.602	1.021	1.542	1.101	1.902
							1.562	1.722	1.623			1.782	1.462	1.542	1.221	2.002
							1.341	1.081	1.303			1.582	1.722	2.262	1.261	1.642
							2.763	1.542	1.162			1.201	1.922	1.201	1.782	1.221
							1.482	1.382	1.223			1.542	1.181	1.582	1.361	1.942
							1.422	1.622	1.343			2.863	1.602	1.221	1.341	1.341
							1.382	1.862	1.924			1.602	1.502	1.522	1.642	1.642
							1.321	1.642	1.984			1.361	2.343	1.662	1.221	1.942
							1.462	1.522	1.022			1.602	2.343	2.142	1.482	0.521
							1.382	1.762	1.683			1.582	1.442	1.642	1.882	1.642
							1.602	1.482	1.363			1.522	2.242	1.702	1.141	1.722
							2.202	1.662	1.283			2.383	1.422	1.782	1.141	1.482
							1.402	1.582	1.303			1.662	1.341	1.402	1.482	2.122
							1.442	1.281	1.724			1.482	1.542	1.722	2.082	0.521
							1.502	1.402	0.942			1.582	1.762	1.382	2.002	1.041
							1.341	1.622	1.924			1.562	0.941	1.442	2.903	1.382
							1.382	1.341	0.962			1.341	1.281	1.562	1.442	1.722
							1.462	1.622	0.942			1.562	1.382	2.663	1.622	2.963
							1.382	1.502	1.202			1.702	2.022	1.602	1.942	1.482
							2.523	1.642	1.884			1.502	1.241	1.602	1.782	1.822
							1.482	1.241	1.363			1.462	1.402	1.762	1.602	2.303
							1.562	1.762	1.323			1.462	1.742	1.582	1.882	2.122
							1.562	1.522	1.343			1.722	1.161	1.422	1.822	0.941
							1.822	1.502	1.543			2.723	1.622	1.702	1.742	1.281
							1.422	1.782	2.365			1.642	1.682	0.701	1.482	1.722
							1.582	2.943	1.223			1.722	1.402	1.542	1.341	1.502
							1.502	1.882	1.062			1.482	1.482	1.702	1.742	1.702
							1.602	1.482	1.303			1.662	1.942	1.341	1.462	2.142
							1.382	1.642	1.663			1.522	1.762	1.281	1.502	1.722
							1.502	1.482	1.303			1.702	3.464	1.582	1.402	1.682
							1.522	1.321	1.643			3.143	1.502	1.682	1.141	1.402
							1.442	1.542	1.463			1.522	3.464	1.462	1.241	1.882
							2.723	1.782	1.383			1.602	1.241	1.842	2.122	2.142
							1.562	1.762	0.842			1.622	1.121	1.702	1.822	1.582
							1.241	1.201	1.423			1.542	1.582	1.382	1.562	1.582
							1.422	1.682	1.343			1.321	1.462	1.462	1.962	1.542
							1.462	2.663	1.323			1.402	4.265	1.201	1.862	1.842
							1.281	1.522	1.283			1.802	1.462	1.462	1.802	0.721
