# Supplementary material for: Myofibril diameter is set by a finely tuned mechanism of protein oligomerization in Drosophila
Source: eLife. 2019 Nov 20;8:e50496. doi: 10.7554/eLife.50496 (PMC6910826; doi:10.7554/eLife.50496)
Supplement: Figure 7—source data 1. [file elife-50496-fig7-data1.xlsx]

## Sheet: Sheet1
Figure 7E Z-disc diameter in blocking isoform mutants;n=50						Figure 7D Aggregate frequency estimates in Zasp mutants						Figure 7I Aggregate frequency estimates in double Zasp overexpressions
Control	Zasp66 -/-	Zasp67 -/-	Zasp66 -/- , Zasp67 -/-			Control	Zasp66 -/-	Zasp67 -/-	Zasp66 -/- , Zasp67 -/-			LacZ+Zasp52-PR-GFP	Zasp52-PP+Zasp52-PR-GFP	Zasp52-PP*143+Zasp52-PR-GFP	Zasp66+Zasp52-PR-GFP	Zasp67+Zasp52-PR-GFP
1.413	1.45	1.708	3.169			0	0.0018797	0.0056391	0.0432331			0.0169173	0.0037594	0.0169173	0	0.0018797
1.413	1.674	1.383	1.837			0	0	0.0037594	0.0469925			0.0131579	0.0018797	0.0225564	0.0037594	0
1.664	1.578	1.416	2.499			0	0	0.0037594	0.0413534			0.0225564	0.0018797	0.0075188	0	0
2.417	1.553	1.927	2.677			0	0.0018797	0.0037594	0.0413534			0.0263158	0.0018797	0.0131579	0.0037594	0
1.51	1.681	1.36	5.365			0	0	0.0018797	0.0394737			0.0206767	0.0093985	0.0112782	0.0037594	0.0018797
1.232	1.631	1.827	3.254			0	0	0.0018797	0.0432331			0.0263158	0.0018797	0.0169173	0	0.0018797
1.785	2.845	2.93	2.998			0	0.0018797	0	0.0357143			0.0394737	0.0018797	0.0075188	0	0.0018797
1.65	1.347	1.598	1.587			0	0	0.0018797	0.0357143			0.0112782	0.0093985	0.0150376	0.0018797	0
2.538	1.539	1.324	1.423			0	0	0.0037594	0.0263158			0.0225564	0.0018797	0.0093985	0	0.0018797
1.441	3.107	1.48	3.169			0	0.0018797	0.0018797	0.0338346			0.037594	0.0056391	0.0169173	0	0
1.759	2.104	1.417	1.352			0	0	0.0037594	0.0300752			0.018797	0.0075188	0.0093985	0	0.0018797
1.263	3.055	1.527	5.918			0	0.0018797	0	0.0394737			0.018797	0	0.0112782	0	0.0018797
1.438	1.654	2.933	4.629			0	0.0018797	0	0.037594			0.0169173	0.0075188	0.0150376	0	0.0037594
1.628	1.571	2.878	4.8			0	0	0	0.0338346			0.0244361	0.0037594	0.0169173	0.0018797	0
1.386	1.97	3.117	1.236			0	0.0018797	0.0018797	0.0244361			0.0150376	0.0056391	0.0131579	0	0
1.447	1.539	1.442	1.439			0	0	0	0.0357143			0.0225564	0.0056391	0.0150376	0	0
1.37	1.354	1.575	2.104			0	0.0018797	0.0056391	0.0263158			0.0131579	0.0037594	0.0093985	0	0
1.286	1.744	1.434	1.439			0	0	0.0037594	0.0507519			0.0225564	0.0075188	0.0244361	0.0018797	0.0018797
1.472	1.556	1.496	1.236			0	0.0018797	0	0.0357143			0.0093985	0	0.0150376	0.0018797	0.0037594
1.389	1.347	1.361	2.677			0	0	0.0018797	0.0488722			0.018797	0.0037594	0.018797	0.0018797	0
1.324	1.546	1.672	2.833			0	0	0.0018797	0.0244361			0.0206767	0.0018797	0.0169173	0.0037594	0.0037594
2.593	1.491	1.534	3.171			0	0.0037594	0.0037594	0.0394737			0.0206767	0.0056391	0.0169173	0	0.0018797
2.042	1.6	1.721	2.677			0	0	0	0.0413534			0.0169173	0.0018797	0.018797	0.0018797	0.0018797
1.36	2.552	3.252	1.837			0	0.0018797	0.0093985	0.056391			0.0131579	0.0037594	0.0056391	0	0.0037594
1.628	1.531	1.253	1.793			0	0	0.0018797	0.0319549			0.0244361	0.0018797	0.0093985	0	0.0018797
1.576	1.569	1.335	2.582			0	0.0037594	0	0.0413534			0.0319549	0.0037594	0.018797	0	0.0037594
1.579	1.407	1.395	2.009			0	0	0.0018797	0.0357143			0.0150376	0.0056391	0.0112782	0	0.0037594
1.53	1.518	1.355	2.582			0	0.0018797	0.0037594	0.0357143			0.0225564	0.0037594	0.0056391	0	0.0018797
1.5	1.597	3.15	2.833			0	0	0.0037594	0.0394737			0.0300752	0.0093985	0.0131579	0.0018797	0.0037594
1.444	1.65	1.334	2.785			0	0	0	0.0413534			0.0244361	0.0112782	0.0169173	0.0018797	0.0037594
1.327	1.405	2.089	4.8			0	0.0018797	0.0018797	0.0469925			0.0225564	0.0112782	0.0150376	0	0.0018797
1.762	1.622	2.408	1.837			0	0	0.0056391	0.0319549			0.0169173	0.0037594	0.0056391	0	0.0037594
1.419	1.438	1.686	3.169			0	0.0018797	0.0018797	0.0469925			0.0244361	0.0056391	0.0056391	0.0018797	0.0018797
1.612	1.603	1.494	1.439			0	0.0018797	0.0018797	0.0281955			0.0093985	0.0037594	0.018797	0	0.0037594
1.386	1.45	2.089	2.32			0	0	0.0018797	0.0413534			0.018797	0	0.0131579	0	0.0018797
1.419	1.683	1.458	1.286			0	0.0018797	0.0018797	0.0413534			0.0281955	0.0056391	0.018797	0	0
1.653	1.654	2.408	1.423			0	0	0.0056391	0.0300752			0.0263158	0.0056391	0.0131579	0	0.0037594
1.5	1.614	1.453	2.806			0	0	0.0037594	0.0507519			0.0206767	0.0131579	0.0112782	0.0018797	0
1.361	1.581	1.633	4.318			0	0	0.0037594	0.037594			0.0206767	0.0075188	0.0112782	0.0037594	0.0018797
1.515	1.778	1.534	2.87			0	0	0.0018797	0.0413534			0.0225564	0.0018797	0.0150376	0.0037594	0
1.44	1.546	1.347	4.629			0	0	0.0056391	0.0300752			0.0300752	0.0093985	0.0112782	0.0018797	0.0018797
1.334	1.519	1.453	1.412			0	0.0018797	0.0037594	0.0357143			0.0300752	0.0075188	0.0075188	0.0018797	0
1.269	1.546	3.252	2.653			0	0	0.0056391	0.0469925			0.0225564	0.0093985	0.0075188	0	0
2.538	3.055	1.764	2.653			0	0	0.0056391	0.0413534			0.018797	0.0018797	0.018797	0	0.0037594
2.431	1.604	1.297	3.822			0	0	0.0037594	0.0319549			0.0206767	0.0037594	0.0169173	0.0018797	0.0018797
1.478	1.726	1.575	2.847			0	0.0018797	0.0056391	0.0281955			0.0225564	0.0112782	0.0169173	0.0037594	0
2.334	1.546	1.338	1.665			0	0.0018797	0.0018797	0.0338346			0.0300752	0.0093985	0.0150376	0.0018797	0.0018797
1.231	1.633	1.954	1.837			0	0	0	0.0338346			0.018797	0.0037594	0.0112782	0	0.0037594
1.443	1.552	1.328	2.971			0	0.0037594	0.0037594	0.0413534			0.0206767	0.0037594	0.0206767	0.0018797	0.0037594
1.531	1.537	1.488	4.629			0	0	0.0018797	0.0488722			0.0244361	0.0056391	0.0112782	0.0018797	0
						0	0	0	0.0432331			0.0112782	0	0.0169173	0.0018797	0
						0	0	0.0018797	0.0394737			0.0300752	0.0018797	0.0131579	0	0.0018797
						0	0	0	0.0319549			0.018797	0.0018797	0.018797	0	0
						0	0	0.0018797	0.0300752			0.0206767	0.0037594	0.018797	0.0018797	0.0018797
						0	0.0018797	0.0056391	0.037594			0.0319549	0.0037594	0.0093985	0	0.0037594
						0	0.0018797	0.0037594	0.0526316			0.0131579	0.0018797	0.0169173	0	0.0018797
						0	0.0018797	0.0018797	0.0451128			0.0131579	0.0056391	0.0169173	0	0.0018797
						0	0.0018797	0.0018797	0.0413534			0.0206767	0.0037594	0.0169173	0	0
						0	0	0.0018797	0.0413534			0.0319549	0.0018797	0.0131579	0.0018797	0.0018797
						0	0	0.0018797	0.0394737			0.0263158	0.0093985	0.0112782	0	0.0018797
						0	0.0018797	0.0018797	0.0507519			0.0206767	0.0075188	0.018797	0.0056391	0.0018797
						0	0.0018797	0.0056391	0.0244361			0.0169173	0.0112782	0.0093985	0.0018797	0.0018797
						0	0.0018797	0.0075188	0.0451128			0.0169173	0.0037594	0.0075188	0	0
						0	0.0018797	0.0037594	0.0357143			0.0281955	0.0075188	0.0150376	0.0018797	0.0018797
						0	0	0	0.0263158			0.0169173	0	0.0093985	0	0
						0	0	0	0.0526316			0.0225564	0.0037594	0.018797	0	0.0037594
						0	0	0.0018797	0.0507519			0.0131579	0.0037594	0.0225564	0.0037594	0
						0	0.0018797	0.0056391	0.0300752			0.0244361	0.0075188	0.0112782	0.0018797	0.0018797
						0	0	0.0018797	0.0319549			0.0244361	0.0037594	0.0131579	0.0018797	0.0018797
						0	0.0018797	0.0037594	0.0413534			0.018797	0.0056391	0.018797	0.0018797	0.0018797
						0	0	0.0018797	0.0338346			0.0300752	0.0056391	0.018797	0	0.0037594
						0	0.0037594	0.0075188	0.0413534			0.0150376	0.0056391	0.0131579	0.0037594	0
						0	0	0.0018797	0.0394737			0.0281955	0.0037594	0.0037594	0	0
						0	0	0.0037594	0.0319549			0.0169173	0.0018797	0.0225564	0.0018797	0.0056391
						0	0	0	0.037594			0.0300752	0.0037594	0.0150376	0.0018797	0
						0	0	0.0056391	0.0338346			0.0244361	0.0075188	0.0075188	0.0037594	0
						0	0.0018797	0.0018797	0.0319549			0.0225564	0.0131579	0.0131579	0	0
						0	0	0.0037594	0.0488722			0.018797	0.0037594	0.0206767	0.0018797	0.0018797
						0	0.0018797	0.0056391	0.0357143			0.0225564	0.0112782	0.0169173	0.0018797	0
						0	0	0.0056391	0.0357143			0.0225564	0.0037594	0.0169173	0	0.0018797
						0	0	0.0075188	0.0507519			0.0300752	0.0018797	0.018797	0	0
						0	0.0018797	0.0056391	0.0488722			0.0150376	0.0112782	0.0244361	0.0037594	0.0037594
						0	0	0.0018797	0.0357143			0.0206767	0.0056391	0.0150376	0.0018797	0
						0	0	0	0.0357143			0.0150376	0.0056391	0.018797	0	0.0018797
						0	0	0	0.037594			0.0300752	0.0056391	0.0244361	0.0018797	0.0018797
						0	0	0.0037594	0.037594			0.0206767	0.0093985	0.0112782	0.0056391	0.0018797
						0	0.0018797	0	0.0357143			0.0150376	0	0.0150376	0	0.0018797
						0	0.0018797	0.0037594	0.0263158			0.0263158	0.0056391	0.018797	0	0.0018797
						0	0	0.0037594	0.0394737			0.0206767	0.0037594	0.0150376	0.0018797	0
						0	0.0018797	0.0056391	0.0451128			0.018797	0.0075188	0.018797	0	0.0018797
						0	0	0.0018797	0.0451128			0.0225564	0.0037594	0.0169173	0.0037594	0
						0	0	0.0056391	0.0488722			0.0263158	0.0018797	0.0150376	0.0018797	0
						0	0	0.0018797	0.0469925			0.0169173	0.0112782	0.018797	0	0.0018797
						0	0	0.0018797	0.0338346			0.018797	0.0037594	0.0112782	0	0
						0	0.0037594	0.0018797	0.0432331			0.0263158	0	0.0075188	0	0
						0	0.0018797	0.0018797	0.0394737			0.0244361	0.0037594	0.0169173	0.0037594	0.0037594
						0	0	0.0018797	0.0469925			0.0281955	0	0.0056391	0.0018797	0
						0	0	0.0056391	0.0300752			0.0263158	0.0056391	0.0206767	0	0.0037594
						0	0	0.0037594	0.0413534			0.0169173	0.0018797	0.0131579	0	0.0018797
						0	0	0.0037594	0.0469925			0.0206767	0.0093985	0.0131579	0.0037594	0.0037594
